# Supplementary material for: Pharmacological Treatments for Borderline Personality Disorder: A Systematic Review and Meta-Analysis
Source: Springer Nature journal article supplement (doi:10.1007/s40263-021-00855-4), 2021-09-08
Supplement: MOESM1 [file 24116382]

# Pharmacological Treatments for Borderline Personality Disorder: A Systematic Review and Meta-analysis

## Supplementary Material

Gerald Gartlehner, MD, MPH<sup>1,2</sup>

Karen Crotty, PhD, MPH<sup>1</sup>

Sara Kennedy, MPH<sup>1</sup>

Mark J. Edlund, MD, PhD<sup>1</sup>

Rania Ali, MPH<sup>1</sup>

Mariam Siddiqui, MPH<sup>1</sup>

Robyn Fortman, BS<sup>1</sup>

Roberta Wines, MPH<sup>1</sup>

Emma Persad, BS<sup>2</sup>

Meera Viswanathan, PhD<sup>1</sup>

<sup>1</sup> RTI International, Research Triangle Park, NC, USA

<sup>2</sup> Danube University Krems, Department for Evidence-based Medicine and Evaluation, Krems, Austria

**Corresponding author:** Gerald Gartlehner ([ggartlehner@rti.org](mailto:ggartlehner@rti.org))

Dr. Karl Dorrekstrasse 30, 3500 Krems, Austria

**Journal:** CNS Drugs

## Supplementary Material

### Supplementary Material Table 1: Search Strategy

#### APA Original Search Strategy

Search Date: June 7, 2018

PubMed:

| Search | Query                                                                                                                                                                                                                 | Results |
|--------|-----------------------------------------------------------------------------------------------------------------------------------------------------------------------------------------------------------------------|---------|
| #1     | ("Borderline Personality Disorder"[Mesh]) OR (borderline [tiab] AND personality [tiab])                                                                                                                               | 8962    |
| #2     | ("animals"[MeSH Terms] OR animal [tiab] OR animals [tiab] OR rat [tiab] OR rats [tiab] OR mouse [tiab] OR mice [tiab] OR rodent [tiab] OR rodents [tiab]) NOT ("humans"[MeSH Terms] OR humans [tiab] OR human [tiab]) | 4419530 |
| #3     | #1 NOT #2                                                                                                                                                                                                             | 8957    |
|        | Limit to English                                                                                                                                                                                                      | 7983    |

EMBASE:

| Search | Query                                                                                                          | Results |
|--------|----------------------------------------------------------------------------------------------------------------|---------|
| #1     | exp *borderline state/ or (borderline and personality).ti. or (borderline and personality).ab.                 | 11073   |
| #2     | limit #1 to (article or article in press or conference paper)                                                  | 7571    |
| #3     | #2 not ((exp animal/ or nonhuman/) not exp human/)                                                             | 7564    |
| #4     | #2 not ((animal or animals or rat or rats or mouse or mice or rodent or rodents) not (humans or human)).ti,ab. | 7548    |
| #5     | #3 or #4                                                                                                       | 7569    |
| #6     | limit #5 to yr="1883 - 2002"                                                                                   | 2765    |
| #7     | limit #5 to yr="2002 - Current"                                                                                | 4929    |
| #8     | remove duplicates from #6                                                                                      | 2740    |
| #9     | remove duplicates from #7                                                                                      | 4739    |
| #10    | #8 or #9                                                                                                       | 7337    |
| #11    | limit #10 to english language                                                                                  | 6356    |

Cochrane Library:

| Search | Query                                                                    | Results                                                      |
|--------|--------------------------------------------------------------------------|--------------------------------------------------------------|
| #1     | MeSH descriptor: [Borderline Personality Disorder] explode all trees     | 390                                                          |
| #2     | borderline and personality:ti,ab,kw (Word variations have been searched) | 684                                                          |
| #3     | #1 or #2                                                                 | 684                                                          |
| #4     | #3 not (pubmed or embase):an                                             | 145 in trials<br>6 in Cochrane reviews<br>9 in Other reviews |

PsycINFO:

| Search | Query                                                                                                                                                                                                                                                                                                                                                                                                                                                                                        | Limiters/Expanders                           | Results   |
|--------|----------------------------------------------------------------------------------------------------------------------------------------------------------------------------------------------------------------------------------------------------------------------------------------------------------------------------------------------------------------------------------------------------------------------------------------------------------------------------------------------|----------------------------------------------|-----------|
| S1     | MM "Borderline Personality Disorder"                                                                                                                                                                                                                                                                                                                                                                                                                                                         |                                              | 5,220     |
| S2     | DE "Borderline Personality Disorder"                                                                                                                                                                                                                                                                                                                                                                                                                                                         |                                              | 7,857     |
| S3     | MA "borderline personality disorder"                                                                                                                                                                                                                                                                                                                                                                                                                                                         |                                              | 4,192     |
| S4     | TI "borderline personality" OR AB "borderline personality"<br>OR SU "borderline personality" OR KW "borderline<br>personality"                                                                                                                                                                                                                                                                                                                                                               |                                              | 11,400    |
| S5     | S1 OR S2 OR S3 OR S4                                                                                                                                                                                                                                                                                                                                                                                                                                                                         |                                              | 11,400    |
| S6     | (MM "Animals" OR DE "Animals" OR DE "Vertebrates" OR<br>DE "Amphibia" OR DE "Birds" OR DE "Fishes" OR DE<br>"Mammals" OR DE "Pigs" OR DE "Reptiles" OR DE "Rats"<br>OR DE "Rodents" OR DE "Mice")                                                                                                                                                                                                                                                                                            |                                              | 329,022   |
| S7     | TI "animals" OR TI "animal" OR TI "mouse" OR TI "mice" OR<br>TI "rodent" OR TI "rodents" OR TI "rat" OR TI "rats" OR SU<br>"animals" OR SU "animal" OR SU "mouse" OR SU "mice"<br>OR SU "rodent" OR SU "rodents" OR SU "rat" OR SU "rats"<br>OR KW "animals" OR KW "animal" OR KW "mouse" OR KW<br>"mice" OR KW "rodent" OR KW "rodents" OR KW "rat" OR<br>KW "rats" OR AB "animals" OR AB "animal" OR AB "mouse"<br>OR AB "mice" OR AB "rodent" OR AB "rodents" OR AB "rat"<br>OR AB "rats" |                                              | 426,155   |
| S8     |                                                                                                                                                                                                                                                                                                                                                                                                                                                                                              | Limiters - Population Group: Animal          | 385,743   |
| S9     | S6 OR S7 OR S8                                                                                                                                                                                                                                                                                                                                                                                                                                                                               |                                              | 459,805   |
| S10    |                                                                                                                                                                                                                                                                                                                                                                                                                                                                                              | Limiters - Population Group: Human           | 3,780,890 |
| S11    | TI "humans" OR TI "human" OR AB "humans" OR AB<br>"human" OR SU "humans" OR SU "human" OR KW<br>"humans" OR KW "human"                                                                                                                                                                                                                                                                                                                                                                       |                                              | 1,585,426 |
| S12    | S10 OR S11                                                                                                                                                                                                                                                                                                                                                                                                                                                                                   |                                              | 3,888,530 |
| S13    | S9 NOT S12                                                                                                                                                                                                                                                                                                                                                                                                                                                                                   |                                              | 310,376   |
| S14    | S5 NOT S13                                                                                                                                                                                                                                                                                                                                                                                                                                                                                   |                                              | 11,398    |
| S15    |                                                                                                                                                                                                                                                                                                                                                                                                                                                                                              | Limiters - Publication Type: All<br>Journals | 3,518,961 |
| S16    | S14 AND S15                                                                                                                                                                                                                                                                                                                                                                                                                                                                                  |                                              | 9,386     |
| S17    | LA English                                                                                                                                                                                                                                                                                                                                                                                                                                                                                   |                                              | 4,207,720 |
| S18    | S16 AND S17                                                                                                                                                                                                                                                                                                                                                                                                                                                                                  |                                              | 8,116     |

## RTI Search Strategy

Search Date: June 15, 2020

PubMed:

| Search | Query                                                                                                                                                                                                                             | Results |
|--------|-----------------------------------------------------------------------------------------------------------------------------------------------------------------------------------------------------------------------------------|---------|
| #1     | "Borderline Personality Disorder"[Mesh] OR "Borderline Disorder"[ti] OR "Borderline Personality Disorder"[tiab] OR "borderline-patient"[ti] OR "borderline patient"[ti] OR "borderline-patients"[ti] OR "borderline patients"[ti] | 8,693   |
| #2     | #1 AND ("2018/01/01"[Date - Publication] : "3000"[Date - Publication])                                                                                                                                                            | 1,202   |
| #3     | #2 AND English[lang]                                                                                                                                                                                                              | 1,161   |

EMBASE

| Search | Query                                                                                                                                                                                                                                                | Results |
|--------|------------------------------------------------------------------------------------------------------------------------------------------------------------------------------------------------------------------------------------------------------|---------|
| #1     | ('borderline state'/de OR 'borderline disorder':ti OR 'borderline-patient':ti OR 'borderline patient':ti OR 'borderline-patients':ti OR 'borderline patients':ti OR 'borderline personality disorder':ti,ab,kw) AND [2018-2020]/py AND [english]/lim | 1,777   |
| #2     | 'borderline personality disorder':ti,kw AND [english]/lim AND [1-1-2018]/sd                                                                                                                                                                          | 990     |
| #3     | #1 OR #2                                                                                                                                                                                                                                             | 1,924   |

Cochrane Library

| Search | Query                                                                                                                                                                                                             | Results |
|--------|-------------------------------------------------------------------------------------------------------------------------------------------------------------------------------------------------------------------|---------|
| #1     | ("Borderline Disorder" OR "Borderline Personality Disorder" OR "borderline-patient" OR "borderline patient" OR "borderline-patients" OR "borderline patients"):ti,ab,kw OR [mh "Borderline Personality Disorder"] | 851     |
| #2     | #1 with Cochrane Library publication date from Jan 2018 to present, in Cochrane Reviews, Cochrane Protocols, Trials, Clinical Answers, Editorials and Special collections                                         | 412     |

APA PsycInfo (via ProQuest)

| Search | Query                                                                                                                                                                                                                                                                                                                                                                                                                         | Results |
|--------|-------------------------------------------------------------------------------------------------------------------------------------------------------------------------------------------------------------------------------------------------------------------------------------------------------------------------------------------------------------------------------------------------------------------------------|---------|
| #1     | if("Borderline Personality Disorder") OR mjsub("Borderline Personality Disorder") OR mainsubject("Borderline Personality Disorder") OR ti("Borderline Personality Disorder" OR "Borderline Disorder" OR "borderline-patient" OR "borderline patient" OR "borderline-patients" OR "borderline patients") OR ab("Borderline Personality Disorder")<br><i>Additional limits - Date: After January 01 2018; Language: English</i> | 986     |

## RTI Update Search Strategy

Search Date: April 6, 2021

The update search was limited to databases that yielded studies during the original searches that met our inclusion criteria.

PubMed:

| Search number | Query                                                                                                                                                                      | Results |
|---------------|----------------------------------------------------------------------------------------------------------------------------------------------------------------------------|---------|
| 1             | "Borderline Personality Disorder"[Mesh] OR "Borderline Disorder*"[ti] OR "Borderline Personality Disorder*"[tiab] OR "borderline patient"[ti] OR "borderline patients"[ti] | 9,260   |
| 2             | #1 NOT ("Animals"[Mesh] NOT "Humans"[Mesh])                                                                                                                                | 9,258   |
| 3             | (#2) AND (("2020"[Date - Publication] : "3000"[Date - Publication]))                                                                                                       | 744     |

APA PsychInfo:

| #  | Query                                 | Limiters/Expanders                                        | Results |
|----|---------------------------------------|-----------------------------------------------------------|---------|
| S1 | DE "Borderline Personality Disorder"  | Search modes - Boolean/Phrase                             | 8,991   |
| S2 | borderline W1 (disorder# OR patient#) | Search modes - Boolean/Phrase                             | 13,511  |
| S3 | S1 OR S2                              | Search modes - Boolean/Phrase                             | 13,511  |
| S4 | S3                                    | Limiters - Publication Year: 2020-2021; Language: English | 510     |

Supplementary Material Table 2: Inclusion and Exclusion Criteria

| Criteria                      | Include                                                                                                                                                                                                                                                                                                                                                                                                                                                                                                                                                                                                                                                                                                                                                                                                                                                                                                                                                                                                                                  | Exclude                                                                                                                                                                                                                                                                                                                                                                                                                                                                                                                                                                                                                                                                                                                                                                                                                                           |                                                                                                                                                                                     |
|-------------------------------|------------------------------------------------------------------------------------------------------------------------------------------------------------------------------------------------------------------------------------------------------------------------------------------------------------------------------------------------------------------------------------------------------------------------------------------------------------------------------------------------------------------------------------------------------------------------------------------------------------------------------------------------------------------------------------------------------------------------------------------------------------------------------------------------------------------------------------------------------------------------------------------------------------------------------------------------------------------------------------------------------------------------------------------|---------------------------------------------------------------------------------------------------------------------------------------------------------------------------------------------------------------------------------------------------------------------------------------------------------------------------------------------------------------------------------------------------------------------------------------------------------------------------------------------------------------------------------------------------------------------------------------------------------------------------------------------------------------------------------------------------------------------------------------------------------------------------------------------------------------------------------------------------|-------------------------------------------------------------------------------------------------------------------------------------------------------------------------------------|
| Participants / population     | <ul style="list-style-type: none"> <li>• Age ≥13</li> <li>• Diagnosed with BPD as defined by DSM-IV, DSM-IV-TR, DSM-5 (Section II or Section III), or ICD-10</li> <li>• For mixed population studies, BPD must account for &gt;=75% of the total population</li> <li>• Subgroups of interest                             <ul style="list-style-type: none"> <li>○ Co-occurring mental disorder</li> <li>○ Age</li> <li>○ Gender</li> <li>○ Race/ Ethnicity</li> <li>○ Genotypes (related to treatment selection, treatment response or adverse effects)</li> </ul> </li> </ul>                                                                                                                                                                                                                                                                                                                                                                                                                                                           | <ul style="list-style-type: none"> <li>• Age &lt;13</li> <li>• Individuals with borderline traits without a specific diagnosis</li> <li>• Diagnosed with BPD as defined by DSM-III-R</li> <li>• Studies in which the primary research focus is a different diagnosis with co-occurring BPD in a subset (&lt;75% of the total population)</li> </ul>                                                                                                                                                                                                                                                                                                                                                                                                                                                                                               |                                                                                                                                                                                     |
| Intervention(s) / exposure(s) | <ul style="list-style-type: none"> <li>○ <b>Anticonvulsant "mood stabilizers":</b> <ul style="list-style-type: none"> <li>– Carbamazepine</li> <li>– Divalproex Sodium</li> <li>– Gabapentin</li> <li>– Lamotrigine</li> <li>– Levetiracetam</li> <li>– Oxcarbazepine</li> <li>– Phenytoin</li> <li>– Pregabalin</li> <li>– Tiagabine</li> <li>– Topiramate</li> <li>– Valproate</li> <li>– Valproic Acid</li> <li>– Vigabatrin</li> <li>– Zonisamide</li> </ul> </li> <li>○ <b>Antipsychotics:</b> <ul style="list-style-type: none"> <li>– Aripiprazole</li> <li>– Asenapine</li> <li>– Chlorpromazine</li> <li>– Clozapine</li> <li>– Fluphenazine</li> <li>– Haloperidol</li> <li>– Iloperidone</li> <li>– Loxapine</li> <li>– Lurasidone</li> <li>– Olanzapine</li> <li>– Paliperidone</li> <li>– Perphenazine</li> <li>– Pimozide</li> <li>– Prochlorperazine</li> <li>– Quetiapine</li> <li>– Risperidone</li> <li>– Thioridazine</li> <li>– Thiothixene</li> <li>– Trifluoperazine</li> <li>– Ziprasidone</li> </ul> </li> </ul> | <ul style="list-style-type: none"> <li>○ <b>Antidepressants:</b> <ul style="list-style-type: none"> <li>– Amitriptyline</li> <li>– Amoxapine</li> <li>– Bupropion</li> <li>– Citalopram</li> <li>– Clomipramine</li> <li>– Desipramine</li> <li>– Desvenlafaxine</li> <li>– Doxepin</li> <li>– Duloxetine</li> <li>– Escitalopram</li> <li>– Fluoxetine</li> <li>– Fluvoxamine</li> <li>– Imipramine</li> <li>– Isocarboxazid</li> <li>– Maprotiline</li> <li>– Mirtazapine</li> <li>– Milnacipran</li> <li>– Nefazodone</li> <li>– Nortriptyline</li> <li>– Paroxetine</li> <li>– Phenelzine</li> <li>– Protriptyline</li> <li>– Sertraline</li> <li>– Selegiline</li> <li>– Tranylcypromine</li> <li>– Trazodone</li> <li>– Trimipramine</li> <li>– Venlafaxine</li> <li>– Vilazodone</li> <li>– Vortioxetine</li> <li>–</li> </ul> </li> </ul> | <ul style="list-style-type: none"> <li>• Complementary/alternative treatments</li> <li>• Somatic therapies</li> <li>• Psychotherapies</li> <li>• Other Pharmacotherapies</li> </ul> |
|                               | <ul style="list-style-type: none"> <li>○ <b>Benzodiazepines:</b> <ul style="list-style-type: none"> <li>– Alprazolam</li> <li>– Clobazam</li> <li>– Clonazepam</li> <li>– Clorazepate</li> </ul> </li> </ul>                                                                                                                                                                                                                                                                                                                                                                                                                                                                                                                                                                                                                                                                                                                                                                                                                             | <ul style="list-style-type: none"> <li>○ <b>Opioid agonists and antagonists:</b> <ul style="list-style-type: none"> <li>– Buprenorphine</li> <li>– Naloxone</li> <li>– Naltrexone</li> </ul> </li> </ul>                                                                                                                                                                                                                                                                                                                                                                                                                                                                                                                                                                                                                                          |                                                                                                                                                                                     |

| Criteria                | Include                                                                                                                                                                                                                                                                                                                                                                                                                                                                                                                                                                                                                                                                                                                                                                                                                                                                                                                                                                                                                                                                                                                                                                                                                                                                                                                                                                                                                                                                                                                                                                                                                                                                                                                                                                                                                                                                                                                                                                                                                                                                                                                                                                                                                                                                                    | Exclude                                                                                                                                                                                                                                                                                          |
|-------------------------|--------------------------------------------------------------------------------------------------------------------------------------------------------------------------------------------------------------------------------------------------------------------------------------------------------------------------------------------------------------------------------------------------------------------------------------------------------------------------------------------------------------------------------------------------------------------------------------------------------------------------------------------------------------------------------------------------------------------------------------------------------------------------------------------------------------------------------------------------------------------------------------------------------------------------------------------------------------------------------------------------------------------------------------------------------------------------------------------------------------------------------------------------------------------------------------------------------------------------------------------------------------------------------------------------------------------------------------------------------------------------------------------------------------------------------------------------------------------------------------------------------------------------------------------------------------------------------------------------------------------------------------------------------------------------------------------------------------------------------------------------------------------------------------------------------------------------------------------------------------------------------------------------------------------------------------------------------------------------------------------------------------------------------------------------------------------------------------------------------------------------------------------------------------------------------------------------------------------------------------------------------------------------------------------|--------------------------------------------------------------------------------------------------------------------------------------------------------------------------------------------------------------------------------------------------------------------------------------------------|
|                         | <ul style="list-style-type: none"> <li>- Chlordiazepoxide</li> <li>- Diazepam</li> <li>- Estazolam</li> <li>- Flurazepam</li> <li>- Lorazepam</li> <li>- Midazolam</li> <li>- Oxazepam</li> <li>- Quazepam</li> <li>- Temazepam</li> <li>- Triazolam</li> </ul>                                                                                                                                                                                                                                                                                                                                                                                                                                                                                                                                                                                                                                                                                                                                                                                                                                                                                                                                                                                                                                                                                                                                                                                                                                                                                                                                                                                                                                                                                                                                                                                                                                                                                                                                                                                                                                                                                                                                                                                                                            | <ul style="list-style-type: none"> <li>o <b>Sedative-hypnotic medications:</b> <ul style="list-style-type: none"> <li>- Eszopiclone</li> <li>- Ramelteon</li> <li>- Suvorexant</li> <li>- Tasimelteon</li> <li>- Zaleplon</li> <li>- Zolpidem</li> </ul> </li> <li>o <b>Melatonin</b></li> </ul> |
| Comparator(s) / control | <ul style="list-style-type: none"> <li>• Interventions listed above for inclusion</li> <li>• Placebo</li> </ul>                                                                                                                                                                                                                                                                                                                                                                                                                                                                                                                                                                                                                                                                                                                                                                                                                                                                                                                                                                                                                                                                                                                                                                                                                                                                                                                                                                                                                                                                                                                                                                                                                                                                                                                                                                                                                                                                                                                                                                                                                                                                                                                                                                            | Interventions listed as excluded above for interventions/exposures                                                                                                                                                                                                                               |
| Outcomes                | <p><b>Pre-specified outcomes</b></p> <p>A. BPD symptoms/diagnostic criteria</p> <ol style="list-style-type: none"> <li>1. Frantic efforts to avoid real or imaginary abandonment</li> <li>2. Pattern of unstable and intense interpersonal relationships characterized by alternating between extremes of idealization and devaluation</li> <li>3. Identity disturbances: markedly and persistent unstable self-image or sense of self</li> <li>4. Impulsivity               <ol style="list-style-type: none"> <li>a. Impulsivity</li> <li>b. Impulsive/behavioral</li> <li>c. Risk taking behaviors</li> <li>d. Lack of restraint</li> </ol> </li> <li>5. Recurrent suicidal behavior, gestures or threats; or self-mutilating behavior               <ol style="list-style-type: none"> <li>a. Nonsuicidal self-injury</li> <li>b. Suicide attempts</li> <li>c. Suicide</li> <li>d. Suicidal ideation</li> <li>e. Self-destructive behavior</li> </ol> </li> <li>6. Affective instability, due to a marked reactivity of mood               <ol style="list-style-type: none"> <li>a. Irritability</li> <li>b. Mood swings</li> <li>c. Affective dysregulation</li> </ol> </li> <li>7. Chronic feelings of emptiness</li> <li>8. Inappropriate intense anger or difficulty controlling anger               <ol style="list-style-type: none"> <li>a. Aggression</li> <li>b. Anger</li> <li>c. Hostility</li> <li>d. Aggressive behavior</li> <li>e. Antisocial behavior</li> </ol> </li> <li>9. Transient, stress-related paranoid ideation, or severe dissociative symptoms               <ol style="list-style-type: none"> <li>a. Dissociation</li> </ol> </li> </ol> <p>B. Other symptoms commonly found in individuals with BPD, but not part of the diagnostic criteria.</p> <ol style="list-style-type: none"> <li>1. Depression and Anxiety</li> </ol> <p>C. Clinical Global Impression</p> <p>D. Functioning</p> <p>E. Adverse Events (AEs)</p> <ol style="list-style-type: none"> <li>a. Rate of any AEs</li> <li>b. Overall serious treatment-related adverse event rate</li> <li>c. Specific serious treatment-related adverse events</li> <li>d. Study withdrawal due to AE</li> </ol> <ul style="list-style-type: none"> <li>• Study withdrawal for any reason</li> </ul> | <p>Outcomes not listed, imaging markers, and physiological markers, biomarkers</p> <p>Outcomes that were not pre-specified, e.g., during post-hoc, exploratory analyses</p>                                                                                                                      |

| Criteria        | Include                                                                                                                                                                                                                                                                                                                                                                                                                                                                                                                               | Exclude                                                                                                                                                                                                                                                                                                                                                              |
|-----------------|---------------------------------------------------------------------------------------------------------------------------------------------------------------------------------------------------------------------------------------------------------------------------------------------------------------------------------------------------------------------------------------------------------------------------------------------------------------------------------------------------------------------------------------|----------------------------------------------------------------------------------------------------------------------------------------------------------------------------------------------------------------------------------------------------------------------------------------------------------------------------------------------------------------------|
| Timing          | <ul style="list-style-type: none"> <li>• Treatment duration <math>\geq 8</math> weeks</li> </ul>                                                                                                                                                                                                                                                                                                                                                                                                                                      | Treatment duration $< 8$ weeks                                                                                                                                                                                                                                                                                                                                       |
| Setting/context | <ul style="list-style-type: none"> <li>• Very high Human Development Index (HDI) Countries*</li> </ul>                                                                                                                                                                                                                                                                                                                                                                                                                                | All other countries                                                                                                                                                                                                                                                                                                                                                  |
| Study design    | <ul style="list-style-type: none"> <li>• RCTs phase 2   3   4</li> <li>• Nonrandomized clinical trials (N<math>\geq 50</math>): <ul style="list-style-type: none"> <li>○ Phase 1   2   3   4</li> </ul> </li> <li>• Observational studies, comparative (N<math>\geq 50</math>) <ul style="list-style-type: none"> <li>○ Cross-sectional</li> <li>○ Prospective cohort</li> <li>○ Retrospective cohort</li> <li>○ Nonconcurrent cohort</li> <li>○ Case-control</li> </ul> </li> <li>• Pooled analyses of controlled studies</li> </ul> | <ul style="list-style-type: none"> <li>• Single-arm dose-finding trials</li> <li>• Observational, noncomparative</li> <li>• Case reports/series</li> <li>• Prognostic course/factor studies</li> <li>• Modeling studies</li> <li>• Pre-clinical</li> <li>• Narrative reviews</li> <li>• Systematic reviews/meta-analyses (will be used for hand searches)</li> </ul> |

\***Very High HDI Countries:** Andorra, Argentina, Australia, Austria, Bahamas, Bahrain, Barbados, Belarus, Belgium, Brunei Darussalam, Bulgaria, Canada, Chile, Croatia, Cyprus, Czechia, Denmark, Estonia, Finland, France, Germany, Greece, Hong Kong, China (SAR), Hungary, Iceland, Ireland, Israel, Italy, Japan, Kazakhstan, Korea (Republic of), Kuwait, Latvia, Liechtenstein, Lithuania, Luxembourg, Malaysia, Malta, Montenegro, Netherlands, New Zealand, Norway, Oman, Poland, Portugal, Qatar, Romania, Russian Federation, Saudi Arabia, Singapore, Slovakia, Slovenia, Spain, Sweden, Switzerland, Taiwan\*\*, United Arab Emirates, United Kingdom, United States, Uruguay.

\*\* The United Nations does not recognize Taiwan (i.e., Republic of China) as a sovereign state and does not include it in the HDI report. However, Taiwan's government calculated its HDI to be 0.885, based on 2014 data and using the same methodology as the United Nations. This HDI value would place Taiwan among countries in the "very high" human development category and will be included in this report.

**Abbreviations:** BPD, borderline personality disorder; KQ, key question; N, sample size; NA, not applicable; RCT, randomized controlled trial.



Supplementary Material Table 3: Excluded Studies at Full Text Level

**List of Exclusion Codes:**

- X1: Ineligible population
- X2: Ineligible intervention
- X3: Ineligible comparator
- X4: Ineligible outcome
- X5: Ineligible timing
- X6: Ineligible study design
- X7: Duplicate or superseded by paper publication
- X8: Non-English full text
- X9: Ineligible country
- X10: Not primary research

- |                                                                                                                                                                                                                                                                                                                                                                  |                                                                                                                                                                                                                                                                                                                   |
|------------------------------------------------------------------------------------------------------------------------------------------------------------------------------------------------------------------------------------------------------------------------------------------------------------------------------------------------------------------|-------------------------------------------------------------------------------------------------------------------------------------------------------------------------------------------------------------------------------------------------------------------------------------------------------------------|
| 1. Amianto F, Ferrero A, Pierò A, et al. Supervised team management, with or without structured psychotherapy, in heavy users of a mental health service with borderline personality disorder: a two-year follow-up preliminary randomized study. <i>BMC Psychiatry</i> . 2011 Nov 21;11:181. doi: 10.1186/1471-244x-11-181. PMID: 22103890. Exclusion Code: X2. | 5. Arnevik E, Wilberg T, Urnes O, et al. Psychotherapy for personality disorders: short-term day hospital psychotherapy versus outpatient individual therapy - a randomized controlled study. <i>Eur Psychiatry</i> . 2009 Mar;24(2):71-8. doi: 10.1016/j.eurpsy.2008.09.004. PMID: 19097870. Exclusion Code: X1. |
| 2. Andión Ó, Ferrer M, Matali J, et al. Effectiveness of combined individual and group dialectical behavior therapy compared to only individual dialectical behavior therapy: a preliminary study. <i>Psychotherapy (Chic)</i> . 2012 Jun;49(2):241-50. doi: 10.1037/a0027401. PMID: 22642527. Exclusion Code: X2.                                               | 6. Bales DL, Timman R, Andrea H, et al. Effectiveness of Day Hospital Mentalization-Based Treatment for Patients with Severe Borderline Personality Disorder: A Matched Control Study. <i>Clin Psychol Psychother</i> . 2015 Sep-Oct;22(5):409-17. doi: 10.1002/cpp.1914. PMID: 25060747. Exclusion Code: X2.     |
| 3. Andreoli A, Burnand Y, Cochenne MF, et al. Disappointed Love and Suicide: A Randomized Controlled Trial of "Abandonment Psychotherapy" Among Borderline Patients. <i>J Pers Disord</i> . 2016 Apr;30(2):271-87. doi: 10.1521/pedi_2015_29_196. PMID: 26111250. Exclusion Code: X2.                                                                            | 7. Bales DL, Verheul R, Hutsebaut J. Barriers and facilitators to the implementation of mentalization-based treatment (MBT) for borderline personality disorder. <i>Personality and mental health</i> . 2017;11(2):118-31. doi: 10.1002/pmh.1368. Exclusion Code: X4.                                             |
| 4. Antonsen BT, Kvarstein EH, Urnes Ø, et al. Favourable outcome of long-term combined psychotherapy for patients with borderline personality disorder: Six-year follow-up of a randomized study. <i>Psychother Res</i> . 2017 Jan;27(1):51-63. doi: 10.1080/10503307.2015.1072283.                                                                              | 8. Barnicot K, Crawford M. Dialectical behaviour therapy v. mentalisation-based therapy for borderline personality disorder. <i>Psychol Med</i> . 2019 Sep;49(12):2060-8. doi: 10.1017/s0033291718002878. PMID: 30303061. Exclusion Code: X2.                                                                     |
|                                                                                                                                                                                                                                                                                                                                                                  | 9. Barnicot K, Crawford M. Conclusions and questions from a non-randomised comparison of routine clinical services                                                                                                                                                                                                |

- implementing different treatment models for borderline personality disorder. *Psychol Med.* 2019 Dec;49(16):2812-4. doi: 10.1017/s0033291719002447. PMID: 31551098. Exclusion Code: X6.
10. Bartak A, Andrea H, Spreeuwenberg MD, et al. Effectiveness of outpatient, day hospital, and inpatient psychotherapeutic treatment for patients with cluster B personality disorders. *Psychother Psychosom.* 2011;80(1):28-38. doi: 10.1159/000321999. PMID: 20975324. Exclusion Code: X2.
  11. Bateman A, Fonagy P. Randomized controlled trial of outpatient mentalization-based treatment versus structured clinical management for borderline personality disorder. *Am J Psychiatry.* 2009 Dec;166(12):1355-64. doi: 10.1176/appi.ajp.2009.09040539. PMID: 19833787. Exclusion Code: X2.
  12. Bateman A, Fonagy P. Impact of clinical severity on outcomes of mentalisation-based treatment for borderline personality disorder. *Br J Psychiatry.* 2013 Sep;203(3):221-7. doi: 10.1192/bjp.bp.112.121129. PMID: 23887998. Exclusion Code: X6.
  13. Bateman A, O'Connell J, Lorenzini N, et al. A randomised controlled trial of mentalization-based treatment versus structured clinical management for patients with comorbid borderline personality disorder and antisocial personality disorder. *BMC Psychiatry.* 2016 Aug 30;16(1):304. doi: 10.1186/s12888-016-1000-9. PMID: 27577562. Exclusion Code: X6.
  14. Beck E, Bo S, Jørgensen MS, et al. Mentalization-based treatment in groups for adolescents with borderline personality disorder: A randomized controlled trial. *Journal of Child Psychology and Psychiatry.* 2020 May 2020 2020-05-18;61(5):594-604. doi: <http://dx.doi.org/10.1111/jcpp.13152>. PMID: 2313759274; 2019-68407-001. Exclusion Code: X7.
  15. Beck E, Bo S, Jørgensen MS, et al. Mentalization-based treatment in groups for adolescents with borderline personality disorder: a randomized controlled trial. *J Child Psychol Psychiatry.* 2020 May;61(5):594-604. doi: 10.1111/jcpp.13152. PMID: 31702058. Exclusion Code: X2.
  16. Bellino S, Bozzatello P, Rocca G, et al. Efficacy of omega-3 fatty acids in the treatment of borderline personality disorder: a study of the association with valproic acid. *J Psychopharmacol.* 2014 Feb;28(2):125-32. doi: 10.1177/0269881113510072. PMID: 24196948. Exclusion Code: X2.
  17. Bellino S, Rinaldi C, Bogetto F. Adaptation of interpersonal psychotherapy to borderline personality disorder: a comparison of combined therapy and single pharmacotherapy. *Can J Psychiatry.* 2010 Feb;55(2):74-81. doi: 10.1177/070674371005500203. PMID: 20181302. Exclusion Code: X2.
  18. Bellino S, Zizza M, Rinaldi C, et al. Combined treatment of major depression in patients with borderline personality disorder: a comparison with pharmacotherapy. *Can J Psychiatry.* 2006 Jun;51(7):453-60. doi: 10.1177/070674370605100707. PMID: 16838827. Exclusion Code: X2.
  19. Bellino S, Zizza M, Rinaldi C, et al. Combined therapy of major depression with concomitant borderline personality disorder: comparison of interpersonal and cognitive psychotherapy. *Can J Psychiatry.* 2007 Nov;52(11):718-25. doi: 10.1177/070674370705201106. PMID: 18399039. Exclusion Code: X2.
  20. Berthoud L, Pascual-Leone A, Caspar F, et al. Leaving Distress Behind: A Randomized Controlled Study on Change in Emotional Processing in Borderline Personality Disorder. *Psychiatry.* 2017 Summer;80(2):139-54. doi: 10.1080/00332747.2016.1220230.

21. PMID: 28767333. Exclusion Code: X6. Bianchini V, Cofini V, Curto M, et al. Dialectical behaviour therapy (DBT) for forensic psychiatric patients: An Italian pilot study. *Crim Behav Ment Health*. 2019 Apr;29(2):122-30. doi: 10.1002/cbm.2102. PMID: 30648303. Exclusion Code: X2.
22. Blum N, St John D, Pfohl B, et al. Systems Training for Emotional Predictability and Problem Solving (STEPPS) for outpatients with borderline personality disorder: a randomized controlled trial and 1-year follow-up. *Am J Psychiatry*. 2008 Apr;165(4):468-78. doi: 10.1176/appi.ajp.2007.07071079. PMID: 18281407. Exclusion Code: X2.
23. Bohus M, Haaf B, Simms T, et al. Effectiveness of inpatient dialectical behavioral therapy for borderline personality disorder: a controlled trial. *Behav Res Ther*. 2004 May;42(5):487-99. doi: 10.1016/s0005-7967(03)00174-8. PMID: 15033496. Exclusion Code: X2.
24. Boritz T, Barnhart R, McMMain SF. The Influence of Posttraumatic Stress Disorder on Treatment Outcomes of Patients With Borderline Personality Disorder. *J Pers Disord*. 2016 Jun;30(3):395-407. doi: 10.1521/pedi\_2015\_29\_207. PMID: 26305394. Exclusion Code: X6.
25. Bos EH, van Wel EB, Appelo MT, et al. A randomized controlled trial of a Dutch version of systems training for emotional predictability and problem solving for borderline personality disorder. *J Nerv Ment Dis*. 2010 Apr;198(4):299-304. doi: 10.1097/NMD.0b013e3181d619cf. PMID: 20386260. Exclusion Code: X2.
26. Bozzatello P, Rocca P, Bellino S. Combination of Omega-3 Fatty Acids and Valproic Acid in Treatment of Borderline Personality Disorder: A Follow-Up Study. *Clin Drug Investig*. 2018 Apr;38(4):367-72. doi: 10.1007/s40261-017-0617-x. PMID: 29302857. Exclusion Code: X2.
27. Buchheim A, Hörz-Sagstetter S, Doering S, et al. Change of Unresolved Attachment in Borderline Personality Disorder: RCT Study of Transference-Focused Psychotherapy. *Psychotherapy and Psychosomatics*. 2017;86(5):314-6. doi: 10.1159/000460257. Exclusion Code: X6.
28. Cailhol L, Roussignol B, Klein R, et al. Borderline personality disorder and rTMS: a pilot trial. *Psychiatry Res*. 2014 Apr 30;216(1):155-7. doi: 10.1016/j.psychres.2014.01.030. PMID: 24503285. Exclusion Code: X2.
29. Carmona i Farrés C, Elices M, Soler J, et al. Effects of mindfulness training on borderline personality disorder: Impulsivity versus emotional dysregulation. *Mindfulness*. 2018 Dec 19 2018-12-27. doi: <http://dx.doi.org/10.1007/s12671-018-1071-4>. PMID: 2160911109; 2018-66070-001. Exclusion Code: X2.
30. Carter GL, Willcox CH, Lewin TJ, et al. Hunter DBT project: randomized controlled trial of dialectical behaviour therapy in women with borderline personality disorder. *Aust N Z J Psychiatry*. 2010 Feb;44(2):162-73. doi: 10.3109/00048670903393621. PMID: 20113305. Exclusion Code: X2.
31. Chanen AM, Jackson HJ, McCutcheon LK, et al. Early intervention for adolescents with borderline personality disorder using cognitive analytic therapy: randomised controlled trial. *Br J Psychiatry*. 2008 Dec;193(6):477-84. doi: 10.1192/bjp.bp.107.048934. PMID: 19043151. Exclusion Code: X2.
32. Chapman AL, Rosenthal MZ, Dixon-Gordon KL, et al. Borderline Personality Disorder and the Effects of Instructed Emotional Avoidance or Acceptance in Daily Life. *Journal of personality disorders*. 2017;31(4):483-502. doi: 10.1521/pedi\_2016\_30\_264. Exclusion Code: X6.

33. Clarkin JF, Levy KN, Lenzenweger MF, et al. Evaluating three treatments for borderline personality disorder: a multiwave study. *Am J Psychiatry*. 2007 Jun;164(6):922-8. doi: 10.1176/ajp.2007.164.6.922. PMID: 17541052. Exclusion Code: X2.
34. Cottraux J, Note ID, Boutitie F, et al. Cognitive therapy versus Rogerian supportive therapy in borderline personality disorder. Two-year follow-up of a controlled pilot study. *Psychother Psychosom*. 2009;78(5):307-16. doi: 10.1159/000229769. PMID: 19628959. Exclusion Code: X2.
35. Coyle TN, Shaver JA, Linehan MM. On the potential for iatrogenic effects of psychiatric crisis services: The example of dialectical behavior therapy for adult women with borderline personality disorder. *J Consult Clin Psychol*. 2018 Feb;86(2):116-24. doi: 10.1037/ccp0000275. PMID: 29369662. Exclusion Code: X6.
36. Davidson K, Norrie J, Tyrer P, et al. The effectiveness of cognitive behavior therapy for borderline personality disorder: results from the borderline personality disorder study of cognitive therapy (BOSCOT) trial. *J Pers Disord*. 2006 Oct;20(5):450-65. doi: 10.1521/pedi.2006.20.5.450. PMID: 17032158. Exclusion Code: X2.
37. Davidson KM, Brown TM, James V, et al. Manual-assisted cognitive therapy for self-harm in personality disorder and substance misuse: a feasibility trial. *Psychiatr Bull* (2014). 2014 Jun;38(3):108-11. doi: 10.1192/pb.bp.113.043109. PMID: 25237519. Exclusion Code: X2.
38. Davidson KM, Tyrer P, Norrie J, et al. Cognitive therapy v. usual treatment for borderline personality disorder: prospective 6-year follow-up. *Br J Psychiatry*. 2010 Dec;197(6):456-62. doi: 10.1192/bjp.bp.109.074286. PMID: 21119151. Exclusion Code: X6.
39. Doering S, Hörz S, Rentrop M, et al. Transference-focused psychotherapy v. treatment by community psychotherapists for borderline personality disorder: randomised controlled trial. *Br J Psychiatry*. 2010 May;196(5):389-95. doi: 10.1192/bjp.bp.109.070177. PMID: 20435966. Exclusion Code: X2.
40. Edel MA, Raaff V, Dimaggio G, et al. Exploring the effectiveness of combined mentalization-based group therapy and dialectical behaviour therapy for inpatients with borderline personality disorder - A pilot study. *Br J Clin Psychol*. 2017 Mar;56(1):1-15. doi: 10.1111/bjc.12123. PMID: 27897326. Exclusion Code: X2.
41. Einy S, Narimani M, Atadokht A, et al. Effectiveness of Mentalization based Therapy and Cognitive-Analytical Therapy on Improved Object Relationship of People with Borderline Personality Disorder: a comparison. *Payesh health monitor*. 2018;17(3):98-110. PMID: CN-02114870. Exclusion Code: X8.
42. Elices M, Pascual JC, Portella MJ, et al. Impact of Mindfulness Training on Borderline Personality Disorder: A Randomized Trial. *Mindfulness*. 2016 2016/06/01;7(3):584-95. doi: 10.1007/s12671-016-0492-1. Exclusion Code: X2.
43. Euler S, Stalujanis E, Allenbach G, et al. Dialectical behavior therapy skills training affects defense mechanisms in borderline personality disorder: An integrative approach of mechanisms in psychotherapy. *Psychother Res*. 2019 Nov;29(8):1074-85. doi: 10.1080/10503307.2018.1497214. PMID: 30005584. Exclusion Code: X4.
44. Farrell JM, Shaw IA, Webber MA. A schema-focused approach to group psychotherapy for outpatients with borderline personality disorder: a randomized controlled trial. *J Behav Ther Exp Psychiatry*. 2009 Jun;40(2):317-28. doi:

- 10.1016/j.jbtep.2009.01.002. PMID: 19176222. Exclusion Code: X2.
45. Farrell JM, Shaw IA, Webber MA. Corrigendum to "A schema-focused approach to group psychotherapy for outpatients with borderline personality disorder: A randomized controlled trial" [(J. Behav. Ther. Exp. Psychiatr.) 40 (2) (June 2009) 317-328]. *J Behav Ther Exp Psychiatry*. 2018 Sep;60:111. doi: 10.1016/j.jbtep.2018.04.001. PMID: 29680679. Exclusion Code: X7.
  46. Feigenbaum JD, Fonagy P, Pilling S, et al. A real-world study of the effectiveness of DBT in the UK National Health Service. *Br J Clin Psychol*. 2012 Jun;51(2):121-41. doi: 10.1111/j.2044-8260.2011.02017.x. PMID: 22574799. Exclusion Code: X2.
  47. Flynn D, Kells M, Joyce M, et al. Dialectical behaviour therapy for treating adults and adolescents with emotional and behavioural dysregulation: study protocol of a coordinated implementation in a publicly funded health service. *BMC Psychiatry*. 2018 Feb 26;18(1):51. doi: 10.1186/s12888-018-1627-9. PMID: 29482538. Exclusion Code: X10.
  48. Giesen-Bloo J, van Dyck R, Spinhoven P, et al. Outpatient psychotherapy for borderline personality disorder: randomized trial of schema-focused therapy vs transference-focused psychotherapy. *Arch Gen Psychiatry*. 2006 Jun;63(6):649-58. doi: 10.1001/archpsyc.63.6.649. PMID: 16754838. Exclusion Code: X2.
  49. Gleeson JF, Chanen A, Cotton SM, et al. Treating co-occurring first-episode psychosis and borderline personality: a pilot randomized controlled trial. *Early Interv Psychiatry*. 2012 Feb;6(1):21-9. doi: 10.1111/j.1751-7893.2011.00306.x. PMID: 22379625. Exclusion Code: X2.
  50. Gratz KL, Tull MT, Levy R. Randomized controlled trial and uncontrolled 9-month follow-up of an adjunctive emotion regulation group therapy for deliberate self-harm among women with borderline personality disorder. *Psychol Med*. 2014 Jul;44(10):2099-112. doi: 10.1017/s0033291713002134. PMID: 23985088. Exclusion Code: X2.
  51. Gray AS, Townsend ML, Bourke ME, et al. Effectiveness of a brief parenting intervention for people with borderline personality disorder: A 12-month follow-up study of clinician implementation in practice. *Advances in Mental Health*. 2018 Apr 21 2018-05-15. doi: <http://dx.doi.org/10.1080/18387357.2018.1464887>. PMID: 2032685803; 2018-19784-001. Exclusion Code: X1.
  52. Gregory RJ, Chlebowski S, Kang D, et al. A controlled trial of psychodynamic psychotherapy for co-occurring borderline personality disorder and alcohol use disorder. *Psychotherapy (Chic)*. 2008 Mar;45(1):28-41. doi: 10.1037/0033-3204.45.1.28. PMID: 22122363. Exclusion Code: X2.
  53. Gregory RJ, Sachdeva S. Naturalistic Outcomes of Evidence-Based Therapies for Borderline Personality Disorder at a Medical University Clinic. *Am J Psychother*. 2016;70(2):167-84. doi: 10.1176/appi.psychotherapy.2016.70.2.167. PMID: 27329405. Exclusion Code: X2.
  54. Griffiths H, Duffy F, Duffy L, et al. Efficacy of Mentalization-based group therapy for adolescents: The results of a pilot randomised controlled trial. *BMC Psychiatry*. 2019;19(1). doi: 10.1186/s12888-019-2158-8. Exclusion Code: X1.
  55. Guillen Botella V, Garcia-Palacios A, Bolo Minana S, et al. Exploring the Effectiveness of Dialectical Behavior Therapy Versus Systems Training for Emotional Predictability and Problem Solving in a Sample of Patients With Borderline Personality Disorder. *J Pers Disord*. 2020 Apr 6:1-18. doi: 10.1521/pedi\_2020\_34\_477. PMID: 32250206. Exclusion Code: X2.

56. Harned MS, Gallop RJ, Valenstein-Mah HR. What changes when? The course of improvement during a stage-based treatment for suicidal and self-injuring women with borderline personality disorder and PTSD. *Psychother Res*. 2018 Sep;28(5):761-75. doi: 10.1080/10503307.2016.1252865. PMID: 27808001. Exclusion Code: X6.
57. Harned MS, Korslund KE, Linehan MM. A pilot randomized controlled trial of Dialectical Behavior Therapy with and without the Dialectical Behavior Therapy Prolonged Exposure protocol for suicidal and self-injuring women with borderline personality disorder and PTSD. *Behav Res Ther*. 2014 Apr;55:7-17. doi: 10.1016/j.brat.2014.01.008. PMID: 24562087. Exclusion Code: X2.
58. Hollander E, Swann AC, Coccaro EF, et al. Impact of trait impulsivity and state aggression on divalproex versus placebo response in borderline personality disorder. *Am J Psychiatry*. 2005 Mar;162(3):621-4. doi: 10.1176/appi.ajp.162.3.621. PMID: 15741486. Exclusion Code: X6.
59. Jariani M, Saaki M, Nazari H, et al. The effect of Olanzapine and Sertraline on personality disorder in patients with methadone maintenance therapy. *Psychiatr Danub*. 2010 Dec;22(4):544-7. PMID: 21169896. Exclusion Code: X9.
60. Jørgensen CR, Bøye R, Andersen D, et al. Eighteen months post-treatment naturalistic follow-up study of mentalization-based therapy and supportive group treatment of borderline personality disorder: Clinical outcomes and functioning. *Nordic Psychology*. 2014;66(4):254-73. Exclusion Code: X6.
61. Jørgensen CR, Freund C, Bøye R, et al. Outcome of mentalization-based and supportive psychotherapy in patients with borderline personality disorder: a randomized trial. *Acta Psychiatr Scand*. 2013 Apr;127(4):305-17. doi: 10.1111/j.1600-0447.2012.01923.x. PMID: 22897123. Exclusion Code: X2.
62. Keller S, Stelmasczyk K, Kolly S, et al. Change in Biased Thinking in a Treatment Based on the Motive-Oriented Therapeutic Relationship for Borderline Personality Disorder. *J Pers Disord*. 2018 Jan;32(Suppl):75-92. doi: 10.1521/pedi.2018.32.suppl.75. PMID: 29388899. Exclusion Code: X6.
63. Keng SL, Lee CSL, Eisenlohr-Moul TA. Effects of brief daily mindfulness practice on affective outcomes and correlates in a high BPD trait sample. *Psychiatry Res*. 2019 Oct;280:112485. doi: 10.1016/j.psychres.2019.112485. PMID: 31408773. Exclusion Code: X6.
64. Keng SL, Tan HH. Effects of brief mindfulness and loving-kindness meditation inductions on emotional and behavioral responses to social rejection among individuals with high borderline personality traits. *Behav Res Ther*. 2018 Jan;100:44-53. doi: 10.1016/j.brat.2017.11.005. PMID: 29179024. Exclusion Code: X10.
65. Keng SL, Tan JX. Effects of brief mindful breathing and loving-kindness meditation on shame and social problem solving abilities among individuals with high borderline personality traits. *Behaviour Research and Therapy*. 2017;97:43-51. doi: 10.1016/j.brat.2017.07.004. Exclusion Code: X1.
66. Khalid-Khan S, Segal SC, Jopling EN, et al. Effectiveness of a modified dialectical behaviour therapy for adolescents within a stepped-care model. *International Journal of Adolescent Medicine and Health*. 2018 Apr 2018 2019-04-12;30(2):1-7. PMID: 2207631172; 2018-17421-001. Exclusion Code: X6.
67. Knoblich N, Gundel F, Bruckmann C, et al. DNA methylation of APBA3 and MCF2 in borderline personality disorder: Potential biomarkers for response to psychotherapy. *Eur Neuropsychopharmacol*. 2018

- Feb;28(2):252-63. doi: 10.1016/j.euroneuro.2017.12.010. PMID: 29274998. Exclusion Code: X4.
68. Kramer U, Berger T, Kolly S, et al. Effects of motive-oriented therapeutic relationship in early-phase treatment of borderline personality disorder: a pilot study of a randomized trial. *J Nerv Ment Dis.* 2011 Apr;199(4):244-50. doi: 10.1097/NMD.0b013e3182125d19. PMID: 21451348. Exclusion Code: X2.
69. Kramer U, Kolly S, Berthoud L, et al. Effects of motive-oriented therapeutic relationship in a ten-session general psychiatric treatment of borderline personality disorder: a randomized controlled trial. *Psychother Psychosom.* 2014;83(3):176-86. doi: 10.1159/000358528. PMID: 24752034. Exclusion Code: X2.
70. Kramer U, Pascual-Leone A, Berthoud L, et al. Assertive Anger Mediates Effects of Dialectical Behaviour-informed Skills Training for Borderline Personality Disorder: A Randomized Controlled Trial. *Clin Psychol Psychother.* 2016 May;23(3):189-202. doi: 10.1002/cpp.1956. PMID: 25864773. Exclusion Code: X4.
71. Krantz LH, McMain S, Kuo JR. The unique contribution of acceptance without judgment in predicting nonsuicidal self-injury after 20-weeks of dialectical behaviour therapy group skills training. *Behav Res Ther.* 2018 May;104:44-50. doi: 10.1016/j.brat.2018.02.006. PMID: 29529508. Exclusion Code: X6.
72. Krause-Utz A, Walther JC, Schweizer S, et al. Effectiveness of an Emotional Working Memory Training in Borderline Personality Disorder: A Proof-of-Principle Study. *Psychother Psychosom.* 2020;89(2):122-4. doi: 10.1159/000504454. PMID: 31901902. Exclusion Code: X2.
73. Krawitz R, Miga EM. Cost-effectiveness of dialectical behaviour therapy for borderline personality disorder. In: Swales MA, ed *The Oxford handbook of dialectical behaviour therapy.* Oxford University Press, New York, NY; 2019:497-513, Chapter xlii, 1057 Pages. Exclusion Code: X6.
74. Kvarstein EH, Pedersen G, Folmo E, et al. Mentalization-based treatment or psychodynamic treatment programmes for patients with borderline personality disorder – the impact of clinical severity. *Psychology and Psychotherapy: Theory, Research and Practice.* 2019 Mar 2019 2019-03-29;92(1):91-111. doi: <http://dx.doi.org/10.1111/papt.12179>. PMID: 2019666106; 2018-13380-001. Exclusion Code: X7.
75. Kvarstein EH, Pedersen G, Urnes Ø, et al. Changing from a traditional psychodynamic treatment programme to mentalization-based treatment for patients with borderline personality disorder--does it make a difference? *Psychol Psychother.* 2015 Mar;88(1):71-86. doi: 10.1111/papt.12036. PMID: 25045028. Exclusion Code: X2.
76. Laporte L, Paris J, Bergevin T, et al. Clinical outcomes of a stepped care program for borderline personality disorder. *Personal Ment Health.* 2018 Aug;12(3):252-64. doi: 10.1002/pmh.1421. PMID: 29709109. Exclusion Code: X2.
77. Laurensen EMP, Luyten P, Kikkert MJ, et al. Day hospital mentalization-based treatment v. specialist treatment as usual in patients with borderline personality disorder: randomized controlled trial. *Psychol Med.* 2018 Nov;48(15):2522-9. doi: 10.1017/s0033291718000132. PMID: 29478425. Exclusion Code: X2.
78. Leichsenring F, Masuhr O, Jaeger U, et al. Psychoanalytic-Interactional Therapy versus Psychodynamic Therapy by Experts for Personality Disorders: A Randomized Controlled Efficacy-Effectiveness Study in Cluster B Personality Disorders. *Psychother Psychosom.* 2016;85(2):71-80. doi:

- 10.1159/000441731. PMID: 26808580. Exclusion Code: X2.
79. Leppänen V, Hakko H, Sintonen H, et al. Comparing Effectiveness of Treatments for Borderline Personality Disorder in Communal Mental Health Care: The Oulu BPD Study. *Community Ment Health J*. 2016 Feb;52(2):216-27. doi: 10.1007/s10597-015-9866-4. PMID: 25824852. Exclusion Code: X2.
80. Lin TJ, Ko HC, Wu JY, et al. The Effectiveness of Dialectical Behavior Therapy Skills Training Group vs. Cognitive Therapy Group on Reducing Depression and Suicide Attempts for Borderline Personality Disorder in Taiwan. *Arch Suicide Res*. 2019 Jan-Mar;23(1):82-99. doi: 10.1080/13811118.2018.1436104. PMID: 29528807. Exclusion Code: X2.
81. Lin TJ, Ko HC, Wu JY, et al. The Effectiveness of Dialectical Behavior Therapy Skills Training Group vs. Cognitive Therapy Group on Reducing Depression and Suicide Attempts for Borderline Personality Disorder in Taiwan. *Arch Suicide Res*. 2019 Jan-Mar;23(1):82-99. doi: 10.1080/13811118.2018.1436104. PMID: 29528807. Exclusion Code: X1.
82. Linehan MM, Comtois KA, Murray AM, et al. Two-year randomized controlled trial and follow-up of dialectical behavior therapy vs therapy by experts for suicidal behaviors and borderline personality disorder. *Arch Gen Psychiatry*. 2006 Jul;63(7):757-66. doi: 10.1001/archpsyc.63.7.757. PMID: 16818865. Exclusion Code: X2.
83. Linehan MM, Dimeff LA, Reynolds SK, et al. Dialectical behavior therapy versus comprehensive validation therapy plus 12-step for the treatment of opioid dependent women meeting criteria for borderline personality disorder. *Drug Alcohol Depend*. 2002 Jun 1;67(1):13-26. doi: 10.1016/s0376-8716(02)00011-x. PMID: 12062776. Exclusion Code: X2.
84. Linehan MM, Korslund KE, Harned MS, et al. Dialectical behavior therapy for high suicide risk in individuals with borderline personality disorder: a randomized clinical trial and component analysis. *JAMA Psychiatry*. 2015 May;72(5):475-82. doi: 10.1001/jamapsychiatry.2014.3039. PMID: 25806661. Exclusion Code: X2.
85. Linehan MM, Schmidt H, 3rd, Dimeff LA, et al. Dialectical behavior therapy for patients with borderline personality disorder and drug-dependence. *Am J Addict*. 1999 Fall;8(4):279-92. doi: 10.1080/105504999305686. PMID: 10598211. Exclusion Code: X1.
86. Lyng J, Swales MA, Hastings RP, et al. Standalone DBT Group Skills Training Versus Standard (i.e. All Modes) DBT for Borderline Personality Disorder: A Natural Quasi-experiment in Routine Clinical Practice. *Community Ment Health J*. 2020 Feb;56(2):238-50. doi: 10.1007/s10597-019-00485-7. PMID: 31673877. Exclusion Code: X2.
87. Marziali E, Munroe-Blum H, McCleary L. The contribution of group cohesion and group alliance to the outcome of group psychotherapy. *Int J Group Psychother*. 1997 Oct;47(4):475-97. doi: 10.1080/00207284.1997.11490846. PMID: 9314699. Exclusion Code: X6.
88. McMMain SF, Fitzpatrick S, Boritz T, et al. Outcome Trajectories and Prognostic Factors for Suicide and Self-Harm Behaviors in Patients With Borderline Personality Disorder Following One Year of Outpatient Psychotherapy. *J Pers Disord*. 2018 Aug;32(4):497-512. doi: 10.1521/pedi\_2017\_31\_309. PMID: 28910214. Exclusion Code: X6.
89. McMMain SF, Guimond T, Barnhart R, et al. A randomized trial of brief dialectical behaviour therapy skills training in suicidal patients suffering from borderline disorder. *Acta Psychiatr Scand*. 2017 Feb;135(2):138-48. doi: 10.1111/acps.12664. PMID: 27858962. Exclusion Code: X2.
90. McMMain SF, Links PS, Gnam WH, et al. A



- randomized trial of dialectical behavior therapy versus general psychiatric management for borderline personality disorder. *Am J Psychiatry*. 2009 Dec;166(12):1365-74. doi: 10.1176/appi.ajp.2009.09010039. PMID: 19755574. Exclusion Code: X2.
91. Mehlum L, Tørmoen AJ, Ramberg M, et al. Dialectical behavior therapy for adolescents with repeated suicidal and self-harming behavior: a randomized trial. *J Am Acad Child Adolesc Psychiatry*. 2014 Oct;53(10):1082-91. doi: 10.1016/j.jaac.2014.07.003. PMID: 25245352. Exclusion Code: X1.
  92. Molavi P, Azizaram S, Basharpour S, et al. Repeated transcranial direct current stimulation of dorsolateral-prefrontal cortex improves executive functions, cognitive reappraisal emotion regulation, and control over emotional processing in borderline personality disorder: A randomized, sham-controlled, parallel-group study. *J Affect Disord*. 2020 May 20;274:93-102. doi: 10.1016/j.jad.2020.05.007. PMID: 32469838. Exclusion Code: X5.
  93. Morey LC, Lowmaster SE, Hopwood CJ. A pilot study of Manual-Assisted Cognitive Therapy with a Therapeutic Assessment augmentation for Borderline Personality Disorder. *Psychiatry Res*. 2010 Aug 15;178(3):531-5. doi: 10.1016/j.psychres.2010.04.055. PMID: 20537722. Exclusion Code: X2.
  94. Morton J, Snowdon S, Gopold M, et al. Acceptance and Commitment Therapy Group Treatment for Symptoms of Borderline Personality Disorder: A Public Sector Pilot Study. *Cognitive and Behavioral Practice*. 2012 2012/11/01/;19(4):527-44. doi: <https://doi.org/10.1016/j.cbpra.2012.03.005>. Exclusion Code: X2.
  95. . A controlled trial of short-term group treatment for borderline personality disorder. 1995. Exclusion Code: X1.
  96. Nadort M, Arntz A, Smit JH, et al. Implementation of outpatient schema therapy for borderline personality disorder with versus without crisis support by the therapist outside office hours: A randomized trial. *Behav Res Ther*. 2009 Nov;47(11):961-73. doi: 10.1016/j.brat.2009.07.013. PMID: 19698939. Exclusion Code: X2.
  97. Navarro-Haro MV, Botella C, Guillen V, et al. Dialectical Behavior Therapy in the Treatment of Borderline Personality Disorder and Eating Disorders Comorbidity: A Pilot Study in a Naturalistic Setting. *Cognitive Therapy and Research*. 2018 2018/10/01;42(5):636-49. doi: 10.1007/s10608-018-9906-9. Exclusion Code: X2.
  98. Neacsiu AD, Lungu A, Harned MS, et al. Impact of dialectical behavior therapy versus community treatment by experts on emotional experience, expression, and acceptance in borderline personality disorder. *Behav Res Ther*. 2014 Feb;53:47-54. doi: 10.1016/j.brat.2013.12.004. PMID: 24418652. Exclusion Code: X4.
  99. Neacsiu AD, Rizvi SL, Linehan MM. Dialectical behavior therapy skills use as a mediator and outcome of treatment for borderline personality disorder. *Behav Res Ther*. 2010 Sep;48(9):832-9. doi: 10.1016/j.brat.2010.05.017. PMID: 20579633. Exclusion Code: X4.
  100. Norrie J, Davidson K, Tata P, et al. Influence of therapist competence and quantity of cognitive behavioural therapy on suicidal behaviour and inpatient hospitalisation in a randomised controlled trial in borderline personality disorder: further analyses of treatment effects in the BOScot study. *Psychol Psychother*. 2013 Sep;86(3):280-93. doi: 10.1111/papt.12004. PMID: 23420622. Exclusion Code: X6.
  101. Pahwa M, Nuñez NA, Joseph B, et al. Efficacy and Tolerability of Lamotrigine in Borderline Personality Disorder: A Systematic Review and Meta-Analysis.

- Psychopharmacol Bull. 2020 Sep 14;50(4):118-36. PMID: 33012875. Exclusion Code: X6.
102. Paret C, Niedtfeld I, Lotter T, et al. Single-dose effects of Citalopram on neural responses to affective stimuli in borderline personality disorder: A randomized clinical trial. *Biol Psychiatry Cogn Neurosci Neuroimaging*. 2021 Feb 16. doi: 10.1016/j.bpsc.2021.02.002. PMID: 33607327. Exclusion Code: X4.
103. Pascual JC, Palomares N, Ibáñez Á, et al. Efficacy of cognitive rehabilitation on psychosocial functioning in Borderline Personality Disorder: a randomized controlled trial. *BMC Psychiatry*. 2015 Oct 21;15:255. doi: 10.1186/s12888-015-0640-5. PMID: 26487284. Exclusion Code: X2.
104. Philips B, Wennberg P, Konradsson P, et al. Mentalization-Based Treatment for Concurrent Borderline Personality Disorder and Substance Use Disorder: A Randomized Controlled Feasibility Study. *Eur Addict Res*. 2018;24(1):1-8. doi: 10.1159/000485564. PMID: 29402870. Exclusion Code: X2.
105. Priebe S, Bhatti N, Barnicot K, et al. Effectiveness and cost-effectiveness of dialectical behaviour therapy for self-harming patients with personality disorder: a pragmatic randomised controlled trial. *Psychother Psychosom*. 2012;81(6):356-65. doi: 10.1159/000338897. PMID: 22964561. Exclusion Code: X1.
106. Rathus JH, Miller AL. Dialectical behavior therapy adapted for suicidal adolescents. *Suicide Life Threat Behav*. 2002 Summer;32(2):146-57. doi: 10.1521/suli.32.2.146.24399. PMID: 12079031. Exclusion Code: X1.
107. Reneses B, Galián M, Serrano R, et al. A new time limited psychotherapy for BPD: preliminary results of a randomized and controlled trial. *Actas Esp Psiquiatr*. 2013 May-Jun;41(3):139-48. PMID: 23803797. Exclusion Code: X2.
108. Reyes-López J, Ricardo-Garcell J, Armas-Castañeda G, et al. Clinical improvement in patients with borderline personality disorder after treatment with repetitive transcranial magnetic stimulation: preliminary results. *Braz J Psychiatry*. 2018 Jan-Mar;40(1):97-104. doi: 10.1590/1516-4446-2016-2112. PMID: 28614492. Exclusion Code: X9.
109. Ridolfi ME, Rossi R, Occhialini G, et al. A Clinical Trial of a Psychoeducation Group Intervention for Patients With Borderline Personality Disorder. *J Clin Psychiatry*. 2019 Dec 31;81(1). doi: 10.4088/JCP.19m12753. PMID: 31917907. Exclusion Code: X5.
110. Ridolfi ME, Rossi R, Occhialini G, et al. A randomized controlled study of a psychoeducation group intervention for patients with borderline personality disorder. *Journal of Clinical Psychiatry*. 2020;81(1). doi: 10.4088/JCP.19m12753. Exclusion Code: X5.
111. Rinne T, van den Brink W, Wouters L, et al. SSRI treatment of borderline personality disorder: a randomized, placebo-controlled clinical trial for female patients with borderline personality disorder. *Am J Psychiatry*. 2002 Dec;159(12):2048-54. doi: 10.1176/appi.ajp.159.12.2048. PMID: 12450955. Exclusion Code: X2.
112. Robinson P, Hellier J, Barrett B, et al. The NOURISHED randomised controlled trial comparing mentalisation-based treatment for eating disorders (MBT-ED) with specialist supportive clinical management (SSCM-ED) for patients with eating disorders and symptoms of borderline personality disorder. *Trials*. 2016 Nov 17;17(1):549. doi: 10.1186/s13063-016-1606-8. PMID: 27855714. Exclusion Code: X2.
113. Rohde C, Polcwiartek C, Correll CU, et al. Real-World Effectiveness of Clozapine for Borderline Personality Disorder: Results From a 2-Year Mirror-Image

- Study. *J Pers Disord.* 2018 Dec;32(6):823-37. doi: 10.1521/pedi\_2017\_31\_328. PMID: 29120277. Exclusion Code: X6.
114. Rossouw TI, Fonagy P. Mentalization-based treatment for self-harm in adolescents: a randomized controlled trial. *J Am Acad Child Adolesc Psychiatry.* 2012 Dec;51(12):1304-13.e3. doi: 10.1016/j.jaac.2012.09.018. PMID: 23200287. Exclusion Code: X1.
115. Ryberg W, Diep LM, Landrø NI, et al. Effects of the collaborative assessment and management of suicidality (cams) model: A secondary analysis of moderation and influencing factors. *Archives of Suicide Research.* 2019 Sep 03;2019-09-12. doi: <http://dx.doi.org/10.1080/13811118.2019.1650143>. PMID: 2288878579; 2019-55242-001. Exclusion Code: X10.
116. Sahin Z, Vinnars B, Gorman BS, et al. Clinical severity as a moderator of outcome in psychodynamic and dialectical behavior therapies for borderline personality disorder. *Personal Disord.* 2018 Sep;9(5):437-46. doi: 10.1037/per0000276. PMID: 29239627. Exclusion Code: X6.
117. Santamarina Perez P, Romero Cela S, Mendez Blanco I, et al. Efficacy of dialectical behavior therapy compared to supportive therapy in adolescents with suicidal behavior. *European neuropsychopharmacology.* 2017;27:S853-S4. PMID: CN-01428527. Exclusion Code: X1.
118. Santisteban DA, Mena MP, Muir J, et al. The efficacy of two adolescent substance abuse treatments and the impact of comorbid depression: results of a small randomized controlled trial. *Psychiatr Rehabil J.* 2015 Mar;38(1):55-64. doi: 10.1037/prj0000106. PMID: 25799306. Exclusion Code: X2.
119. Schilling L, Moritz S, Kriston L, et al. Efficacy of metacognitive training for patients with borderline personality disorder: Preliminary results. *Psychiatry Res.* 2018 Apr;262:459-64. doi: 10.1016/j.psychres.2017.09.024. PMID: 28927866. Exclusion Code: X2.
120. Shafti SS, Shahveisi B. Olanzapine versus haloperidol in the management of borderline personality disorder: a randomized double-blind trial. *J Clin Psychopharmacol.* 2010 Feb;30(1):44-7. doi: 10.1097/JCP.0b013e3181c826ff. PMID: 20075647. Exclusion Code: X9.
121. Signer S, Estermann Jansen R, Sachse R, et al. Social interaction patterns, therapist responsiveness, and outcome in treatments for borderline personality disorder. *Psychol Psychother.* 2019 Oct 4:e12254. doi: 10.1111/papt.12254. PMID: 31583805. Exclusion Code: X6.
122. Sinnaeve R, van den Bosch LMC, Hakkaart-van Roijen L, et al. Effectiveness of step-down versus outpatient dialectical behaviour therapy for patients with severe levels of borderline personality disorder: a pragmatic randomized controlled trial. *Borderline Personal Disord Emot Dysregul.* 2018;5:12. doi: 10.1186/s40479-018-0089-5. PMID: 30002832. Exclusion Code: X2.
123. Sinyor M, Williams M, Mitchell R, et al. Cognitive behavioral therapy for suicide prevention in youth admitted to hospital following an episode of self-harm: A pilot randomized controlled trial. *Journal of Affective Disorders.* 2020;266:686-94. doi: 10.1016/j.jad.2020.01.178. Exclusion Code: X1.
124. Smith EG. An Opportunity to Report Closer-to-Efficacy Findings in a Study of Lamotrigine for Borderline Personality Disorder. *Am J Psychiatry.* 2018 Dec 1;175(12):1265. doi: 10.1176/appi.ajp.2018.18080991. PMID: 30501419. Exclusion Code: X6.
125. Smits ML, Feenstra DJ, Eeren HV, et al. Day hospital versus intensive outpatient mentalisation-based treatment for borderline personality disorder: multicentre randomised clinical trial. *Br*

**Kommentiert [PW1]:** Exclusion reason is missing

**Kommentiert [gg2R1]:** And the reference is incomplete

**Kommentiert [KS3R1]:** There was an extra space in the reference, the exclusion code is X10

- J Psychiatry. 2020 Feb;216(2):79-84. doi: 10.1192/bjp.2019.9. PMID: 30791963. Exclusion Code: X2.
126. Soler J, Elices M, Pascual JC, et al. Effects of mindfulness training on different components of impulsivity in borderline personality disorder: results from a pilot randomized study. *Borderline Personal Disord Emot Dysregul.* 2016;3:1. doi: 10.1186/s40479-015-0035-8. PMID: 26759718. Exclusion Code: X6.
127. Soler J, Pascual JC, Tiana T, et al. Dialectical behaviour therapy skills training compared to standard group therapy in borderline personality disorder: a 3-month randomised controlled clinical trial. *Behav Res Ther.* 2009 May;47(5):353-8. doi: 10.1016/j.brat.2009.01.013. PMID: 19246029. Exclusion Code: X2.
128. St-Amour S, Cailhol L, Ruocco AC, et al. Could physical exercise be an effective treatment for adults with borderline personality disorder? *Psychiatry Res.* 2021 Jan;295:113625. doi: 10.1016/j.psychres.2020.113625. Epub 2020 Dec 2. PMID: 33302133. Exclusion Code: X2.
129. Thompson-Brenner H, Shingleton RM, Thompson DR, et al. Focused vs. Broad Enhanced Cognitive Behavioral Therapy for Bulimia Nervosa with Comorbid Borderline Personality: a Randomized Controlled Trial. *International journal of eating disorders.* 2016;49(1):36-49. doi: 10.1002/eat.22468. PMID: CN-02109829. Exclusion Code: X1.
130. Turner RM. Naturalistic evaluation of dialectical behavior therapy-oriented treatment for borderline personality disorder. *Cognitive and Behavioral Practice.* 2000;7(4):413-9. Exclusion Code: X2.
131. Verheul R, Van Den Bosch LM, Koeter MW, et al. Dialectical behaviour therapy for women with borderline personality disorder: 12-month, randomised clinical trial in The Netherlands. *Br J Psychiatry.* 2003 Feb;182:135-40. doi: 10.1192/bjp.182.2.135. PMID: 12562741. Exclusion Code: X2.
132. Vita A, Deste G, Barlati S, et al. Feasibility and effectiveness of cognitive remediation in the treatment of borderline personality disorder. *Neuropsychol Rehabil.* 2018 Apr;28(3):416-28. doi: 10.1080/09602011.2016.1148054. PMID: 26872501. Exclusion Code: X2.
133. Waltz J, Dimeff LA, Koerner K, et al. Feasibility of Using Video to Teach a Dialectical Behavior Therapy Skill to Clients With Borderline Personality Disorder. *Cognitive and behavioral practice.* 2009;16(2):214-22. doi: 10.1016/j.cbpra.2008.08.004. PMID: CN-01742938. Exclusion Code: X4.
134. Weinberg I, Gunderson JG, Hennen J, et al. Manual assisted cognitive treatment for deliberate self-harm in borderline personality disorder patients. *J Pers Disord.* 2006 Oct;20(5):482-92. doi: 10.1521/pedi.2006.20.5.482. PMID: 17032160. Exclusion Code: X2.
135. Wong MT, Tye C. Low hospital inpatient readmission rate in patients with borderline personality disorder: a naturalistic study at Southern Health, Victoria, Australia. *Aust N Z J Psychiatry.* 2005 Jul;39(7):607-11. doi: 10.1080/j.1440-1614.2005.01633.x. PMID: 15996142. Exclusion Code: X4.
136. Zanarini MC, Conkey LC, Temes CM, et al. Randomized Controlled Trial of Web-Based Psychoeducation for Women With Borderline Personality Disorder. *J Clin Psychiatry.* 2018 May/Jun;79(3). doi: 10.4088/JCP.16m11153. PMID: 28703950. Exclusion Code: X2.
137. Zanarini MC, Frankenburg FR. A preliminary, randomized trial of psychoeducation for women with borderline personality disorder. *J Pers Disord.* 2008 Jun;22(3):284-90. doi: 10.1521/pedi.2008.22.3.284. PMID: 18540800. Exclusion Code: X2.
138. Zanarini MC, Schulz SC, Detke H, et al.

- Open-label treatment with olanzapine for patients with borderline personality disorder. *J Clin Psychopharmacol.* 2012 Jun;32(3):398-402. doi: 10.1097/JCP.0b013e3182524293. PMID: 22544004. Exclusion Code: X3.
139. Zeifman RJ, Boritz T, Barnhart R, et al. The independent roles of mindfulness and distress tolerance in treatment outcomes in dialectical behavior therapy skills training. *Personal Disord.* 2020 May;11(3):181-90. doi: 10.1037/per0000368. PMID: 31647267. Exclusion Code: X6.
140. Ziegenhorn AA, Roepke S, Schommer NC, et al. Clonidine improves hyperarousal in borderline personality disorder with or without comorbid posttraumatic stress disorder: a randomized, double-blind, placebo-controlled trial. *J Clin Psychopharmacol.* 2009 Apr;29(2):170-3. doi: 10.1097/JCP.0b013e31819a4bae. PMID: 19512980. Exclusion Code: X2.

Supplementary Material Table 4: Study Characteristics and Findings of Included Trials

| Author (year)<br>Trial name | Study characteristics                                                                                                                        | N of participants<br>Interventions<br>Duration                                                                                                | Study population including<br>main inclusion and exclusion<br>criteria                                                                                                                                                                                                                                                                                                                                                                                      | Sample demographics                                                                                                                                            | Primary outcome; main results;<br>attrition                                                                                                                                                                                                                                                                                                                                                                                                                                                                                                                                                                                                                   | Risk of bias |
|-----------------------------|----------------------------------------------------------------------------------------------------------------------------------------------|-----------------------------------------------------------------------------------------------------------------------------------------------|-------------------------------------------------------------------------------------------------------------------------------------------------------------------------------------------------------------------------------------------------------------------------------------------------------------------------------------------------------------------------------------------------------------------------------------------------------------|----------------------------------------------------------------------------------------------------------------------------------------------------------------|---------------------------------------------------------------------------------------------------------------------------------------------------------------------------------------------------------------------------------------------------------------------------------------------------------------------------------------------------------------------------------------------------------------------------------------------------------------------------------------------------------------------------------------------------------------------------------------------------------------------------------------------------------------|--------------|
| Black<br>(2014)[1]          | Design: Double-<br>blinded RCT<br><br>Setting:<br>Outpatient,<br>multicenter<br><br>Country: United<br>States<br><br>Funding:<br>AstraZeneca | N=95<br><br>G1 (29): Placebo<br><br>G2 (33):<br>Quetiapine ER<br>(150 mg/day)<br><br>G3 (33):<br>Quetiapine ER<br>(300 mg/day)<br><br>8 weeks | Inclusion: Males and females;<br>18 to 45 years of age; DSM-IV<br>criteria for personality<br>disorders; $\geq 9$ on the Zanarini<br>Rating Scale for BPD<br><br>Exclusion: History of psychotic<br>disorder, neurological<br>condition, cognitive<br>impairment; current substance<br>use disorder or abuse;<br>medically unstable; history of<br>lack of response to a second-<br>generation antipsychotic;<br>pregnant or lactating; acutely<br>suicidal | Mean (SD) age: G1: 30<br>(8.8)<br><br>G2: 28 (8.0)<br><br>G3: 30 (8.1)<br><br>% Female: 30<br><br>% Race/ethnicity:<br>European-Caucasian: 78<br><br>Other: 21 | Primary outcome: ZAN-BPD at 8 weeks<br><br>G2 (but not G3) significantly more<br>effective than G1 on ZAN-BPD (data NR;<br>$p=0.03$ )<br><br>G3 (but not G2) significantly more<br>effective on SCL-90 than G1 (data NR;<br>$p=0.03$ )<br><br>G2 and G3 significantly more effective on<br>MOAS (data NR; $p=0.01$ )<br><br>No significant differences on Barratt<br>Impulsiveness Scale, MADRS, Sheehan<br>Disability Scale<br><br>Incidence of AEs:<br>G1: 86% (25/29)<br>G2: 88% (29/33)<br>G3: 91% (30/33)<br><br>Withdrawals due to AEs: NR<br><br>Attrition: 33%<br><br>Differential attrition:<br>G1: 21% (6/29)<br>G2: 33% (11/33)<br>G3: 42% (14/33) | Moderate     |

(continued)

Supplementary Material Table 4: Study Characteristics and Findings of Included Trials (continued)

| Author (year)<br>Trial name | Study characteristics                                                                                                                    | N of participants<br>Interventions<br>Duration                                                        | Study population including<br>main inclusion and exclusion<br>criteria                                                                                                                                                                                                                    | Sample demographics                                                                                                                     | Primary outcome; main results;<br>attrition                                                                                                                                                                                                                                                                                                                                           | Risk of bias |
|-----------------------------|------------------------------------------------------------------------------------------------------------------------------------------|-------------------------------------------------------------------------------------------------------|-------------------------------------------------------------------------------------------------------------------------------------------------------------------------------------------------------------------------------------------------------------------------------------------|-----------------------------------------------------------------------------------------------------------------------------------------|---------------------------------------------------------------------------------------------------------------------------------------------------------------------------------------------------------------------------------------------------------------------------------------------------------------------------------------------------------------------------------------|--------------|
| Bogenschutz<br>(2004)[2]    | Design: Double-<br>blinded RCT<br>Setting:<br>Outpatient,<br>single center<br>Country: United<br>States<br>Funding: Eli Lilly<br>and Co. | N=40<br>G1 (20): Placebo<br>G2 (20):<br>Olanzapine (2.5<br>to 20 mg/d)<br>12 weeks                    | Inclusion: Medically stable; 18<br>to 60 years of age; DSM-IV<br>criteria for BPD<br>Exclusion: Other psychiatric<br>disorders; substance use<br>disorder; actively suicidal                                                                                                              | Mean (SD) age:<br>32 (10.3)<br>% Female: 63<br>% Race/ethnicity:<br>White: 58<br>Hispanic: 25<br>Asian/Pacific Islander: 8<br>Other: 10 | Primary outcome: CGI-BPD at 12 weeks<br>Significantly greater improvement of G2<br>than G1 on the CGI-BPD (data NR;<br>p=0.03)<br>No significant differences on SCL-90,<br>HAM-A, HAM-D, MOAS, and GAF<br>Incidence of AEs: NR<br>Withdrawal due to AEs:<br>G1: 0% (0/20)<br>G2: 20% (4/20)<br>Attrition: 43%<br>Differential attrition:<br>G1: 35% (7/20)<br>G2: 50% (10/20)         | High         |
| Bozzatello<br>(2017)[3]     | Design: Double-<br>blinded RCT<br>Setting:<br>Outpatient,<br>single center<br>Country: Italy<br>Funding: None                            | N=51<br>G1 (26):<br>Olanzapine (5-10<br>mg/day)<br>G2 (25):<br>Asenapine (5-10<br>mg/day)<br>12 weeks | Inclusion: 18 to 50 years of<br>age; DSM-5 criteria for BPD<br>Exclusion: Dementia;<br>schizophrenia or other<br>psychotic disorders; bipolar<br>disorders; co-occurring major<br>depressive episode; substance<br>abuse; past use of<br>psychotropic medications<br>and/or psychotherapy | Mean (SD) age: 25 (5.3)<br>% Female: 63<br>% Race/ethnicity: NR                                                                         | Primary outcome: NR<br>No significant differences between G1<br>and G2 on BPDSI, CGI-S, Barratt<br>Impulsiveness Scale, MOAS, HAM-D, and<br>Self-Harm Inventory at 12 weeks<br>Incidence of AEs (completers):<br>G1: 26% (5/19)<br>G2: 19% (4/21)<br>Withdrawal due to AEs:<br>G1: 11% (2/19)<br>G2: 10% (2/21)<br>Attrition: 22%<br>Differential attrition: ≤10 percentage<br>points | High         |

(continued)

Supplementary Material Table 4: Study Characteristics and Findings of Included Trials (continued)

| Author (year)<br>Trial name     | Study characteristics                                                                                                                                                        | N of participants<br>Interventions<br>Duration                                           | Study population including<br>main inclusion and exclusion<br>criteria                                                                                                                                                                                                                                                                                                                                                                                       | Sample demographics                                                                                                                           | Primary outcome; main results;<br>attrition                                                                                                                                                                                                                                                                                                                                                                                                                                                           | Risk of bias |
|---------------------------------|------------------------------------------------------------------------------------------------------------------------------------------------------------------------------|------------------------------------------------------------------------------------------|--------------------------------------------------------------------------------------------------------------------------------------------------------------------------------------------------------------------------------------------------------------------------------------------------------------------------------------------------------------------------------------------------------------------------------------------------------------|-----------------------------------------------------------------------------------------------------------------------------------------------|-------------------------------------------------------------------------------------------------------------------------------------------------------------------------------------------------------------------------------------------------------------------------------------------------------------------------------------------------------------------------------------------------------------------------------------------------------------------------------------------------------|--------------|
| Crawford<br>(2018)[4]<br>LABILE | Design: Double-<br>blinded RCT<br><br>Setting:<br>Outpatient,<br>multicenter<br><br>Country: United<br>Kingdom<br><br>Funding: NIHR                                          | N=276<br>G1 (139): Placebo<br>G2 (137):<br>Lamotrigine (200<br>mg/day)<br>52 weeks       | Inclusion: Met DSM-IV criteria<br>for BPD<br><br>Exclusion: Met diagnostic<br>criteria for bipolar disorder<br>(type I or II); psychotic<br>disorder; history of liver or<br>kidney impairment                                                                                                                                                                                                                                                               | Mean (SD) age:<br>G1: 36 (11.0)<br>G2: 36 (11.0)<br>% Female: 75<br>% Race/ethnicity:<br>White: 89<br>Black: 4<br>Asian: 1<br>Other: 6        | Primary outcome: ZAN-BPD at 52 weeks<br><br>No significant differences on ZAN-BPD,<br>Self-Harm Inventory, Social Functioning<br>Questionnaire, and EQ-5D-3l<br><br>Incidence of AEs:<br>G1: 67% (93/139)<br>G2: 56% (77/137)<br><br>Withdrawal due to AEs:<br>G1: 1% (1/139)<br>G2: 4% (4/137)<br><br>Attrition: 29%<br><br>Differential attrition: <10 percentage<br>points                                                                                                                         | Moderate     |
| Frankenburg<br>(2002)[5]        | Design: Double-<br>blinded RCT<br><br>Setting:<br>Community<br>recruitment<br>with<br>advertisements<br><br>Country: United<br>States<br><br>Funding: Abbott<br>Laboratories | N=30<br>G1 (10): Placebo<br>G2 (20):<br>Divalproex<br>sodium (250<br>mg/day)<br>24 weeks | Inclusion: Females; 18 to 40<br>years of age; DIB-R and DSM-IV<br>criteria for BPD and bipolar II<br>disorder<br><br>Exclusion: Formerly treated<br>with divalproex sodium;<br>medically ill; seizure disorder;<br>current substance abuse;<br>current criteria for a major<br>depressive episode or a<br>hypomanic episode; current or<br>lifetime criteria for<br>schizophrenia, schizoaffective<br>disorder, psychotic disorder, or<br>bipolar I disorder | Mean (SD) age:<br>G1: 26 (7.3)<br>G2: 27 (7.4)<br>% Female: 100<br>% Race/ethnicity: White:<br>67<br>Black: 10<br>Hispanic: 13<br>Biracial: 7 | Primary outcome: MOAS; SCL-90-R<br>(subscales on anger, interpersonal<br>hostility, depression) at 24 weeks<br><br>G2 significantly more effective than G1<br>on MOAS (3.0 vs. 1.9; p=0.03), and SCL-<br>90-R subscales on anger/hostility (0.8 vs.<br>0.6; p=0.01) and interpersonal sensitivity<br>(0.8 vs. 0.4; p=0.04)<br><br>Incidence of AEs: NR<br><br>Withdrawal due to AEs:<br>G1: 30% (3/10)<br>G2: 5% (1/20)<br><br>Attrition: 63%<br><br>Differential attrition: <10 percentage<br>points | High         |

(continued)



Supplementary Material Table 4: Study Characteristics and Findings of Included Trials (continued)

| Author (year)<br>Trial name | Study characteristics                                                                                                            | N of participants<br>Interventions<br>Duration                                 | Study population including<br>main inclusion and exclusion<br>criteria                                                                                                                                                                                                                                                                                                                     | Sample demographics                                                                                                                   | Primary outcome; main results;<br>attrition                                                                                                                                                                                                                                                 | Risk of bias |
|-----------------------------|----------------------------------------------------------------------------------------------------------------------------------|--------------------------------------------------------------------------------|--------------------------------------------------------------------------------------------------------------------------------------------------------------------------------------------------------------------------------------------------------------------------------------------------------------------------------------------------------------------------------------------|---------------------------------------------------------------------------------------------------------------------------------------|---------------------------------------------------------------------------------------------------------------------------------------------------------------------------------------------------------------------------------------------------------------------------------------------|--------------|
| Hollander<br>(2001)[6]      | Design: Double-blinded RCT<br>Setting: Outpatient, single center<br>Country: United States<br>Funding: Abbott Laboratories, NIMH | N=16<br>G1 (4): Placebo<br>G2 (12): Divalproex sodium (250 mg/day)<br>10 weeks | Inclusion: DSM-IV criteria for BPD<br>Exclusion: Medical or neurological illness; psychotic disorders; current substance abuse; bipolar disorder type 1 or 2; current major depression; current suicidal ideation                                                                                                                                                                          | Mean (SD) age: 38.6 (10.37)<br>% Female: 52<br>% Race/ethnicity:<br>White: 67<br>Black: 14<br>Hispanic: 19                            | Primary outcome: NR<br>No significant differences on CGI-I, Global Assessment Scale, MOAS, and Aggression Questionnaire<br>Incidence of AEs: NR<br>Withdrawal due to AEs:<br>G1: 0% (0/4)<br>G2: 0% (0/12)<br>Attrition: 63%<br>Differential attrition:<br>G1: 100% (4/4)<br>G2: 50% (6/12) | High         |
| Linehan<br>(2008)[7]        | Design: Double-blinded RCT<br>Setting: University hospital<br>Country: United States<br>Funding: Eli Lilly                       | N=24<br>G1 (12): Placebo<br>G2 (12): Olanzapine (5 mg/day)<br>6 months         | Inclusion: Females; 18 to 60 years of age; met SCID-II and Borderline Personality Disorder Examination criteria for BPD; MOAS irritability subscale $\geq 6$<br>Exclusion: Schizophrenia; bipolar I disorder; schizoaffective disorder; major depressive disorder with psychotic features or other psychotic disorder; intellectual disability or seizure disorder; substance use disorder | Mean (SD) age: 37 (9.0)<br>% Female: 100<br>% Race/ethnicity:<br>White: 79<br>Black: 4<br>Native American: 4<br>Latino: 4<br>Other: 8 | Primary outcome: NR<br>No significant differences between G1 and G2 on MOAS and HAM-D and for self-inflicted injury<br>Incidence of AEs: NR<br>Withdrawal due to AEs:<br>G1: 0% (0/12)<br>G2: 8% (1/12)<br>Attrition: 33%<br>Differential attrition:<br>$\leq 10$ percentage points         | High         |

(continued)

Supplementary Material Table 4: Study Characteristics and Findings of Included Trials (continued)

| Author (year)<br>Trial name | Study characteristics                                                                                                | N of participants<br>Interventions<br>Duration                           | Study population including<br>main inclusion and exclusion<br>criteria                                                                                                                                                                                                                                                                                | Sample demographics                                                                                                                       | Primary outcome; main results;<br>attrition                                                                                                                                                                                                                                                                                                                                 | Risk of bias |
|-----------------------------|----------------------------------------------------------------------------------------------------------------------|--------------------------------------------------------------------------|-------------------------------------------------------------------------------------------------------------------------------------------------------------------------------------------------------------------------------------------------------------------------------------------------------------------------------------------------------|-------------------------------------------------------------------------------------------------------------------------------------------|-----------------------------------------------------------------------------------------------------------------------------------------------------------------------------------------------------------------------------------------------------------------------------------------------------------------------------------------------------------------------------|--------------|
| Loew<br>(2006)[8]           | Design: Double-blinded RCT<br>Setting: Single center or multicenter<br>Country: Germany and Austria<br>Funding: None | N=56<br>G1 (28): Placebo<br>G2 (28): Topiramate (200 mg/day)<br>10 weeks | Inclusion: Females; aged 18 to 35 years; DSM-IV criteria for BPD<br>Exclusion: Schizophrenia; current use of psychotropic medication, or psychotherapy; suicidal; substance abuse; severe somatic illness                                                                                                                                             | Mean (SD) age:<br>G1: 26 (5.7)<br>G2: 25 (5.3)<br>% Female: 100<br>% Race/ethnicity: NR                                                   | Primary outcome: SCL-90-R, SF-36, and Inventory of Interpersonal Problems at 10 weeks<br>G2 significantly more effective than G1 on SCL-90-R (7.4 vs.1.8; p<0.001), SF-36 (data NR; p<0.01), and Inventory of Interpersonal Problems (data NR; p=NR)<br>Incidence of AEs: NR<br>Withdrawal due to AEs: NR<br>Attrition: 7%<br>Differential attrition: <10 percentage points | Low          |
| Moen<br>(2012)[9]           | Design: Double-blinded RCT<br>Setting: Outpatient, single center<br>Country: United States<br>Funding: Abbott        | N=15<br>G1 (5): Placebo<br>G2 (10): Divalproex sodium (NR)<br>12 weeks   | Inclusion: 21 to 55 years of age; DSM-IV criteria for BPD; ≥150 on the SCL-90; ≥5 on the SCID-II<br>Exclusion: Current or past history of bipolar disorder, schizophrenia, or major depression with psychotic features; current psychotropic medication; acutely suicidal; substance use disorder; seizure disorder and/or anticonvulsant medications | Mean (range)<br>G1: 37 (22-51)<br>G2: 34 (23-45)<br>% Female: 80<br>% Race/ethnicity:<br>White: 80<br>Black: 7<br>Hispanic: 7<br>Mixed: 7 | Primary outcome: NR<br>No significant differences on SCL-90, Barratt Impulsiveness Scale, and Borderline Evaluation of Severity Over Time<br>Incidence of AEs: NR<br>Withdrawal due to AEs: NR<br>Attrition: 40%<br>Differential attrition: <10 percentage points                                                                                                           | High         |

(continued)

Supplementary Material Table 4: Study Characteristics and Findings of Included Trials (continued)

| Author (year)<br>Trial name                   | Study characteristics                                                                                                                                         | N of participants<br>Interventions<br>Duration                                | Study population including<br>main inclusion and exclusion<br>criteria                                                                                                                                                                                                                                                             | Sample demographics                                                                                | Primary outcome; main results;<br>attrition                                                                                                                                                                                                                                                                                                                                                                                                                                   | Risk of bias |
|-----------------------------------------------|---------------------------------------------------------------------------------------------------------------------------------------------------------------|-------------------------------------------------------------------------------|------------------------------------------------------------------------------------------------------------------------------------------------------------------------------------------------------------------------------------------------------------------------------------------------------------------------------------|----------------------------------------------------------------------------------------------------|-------------------------------------------------------------------------------------------------------------------------------------------------------------------------------------------------------------------------------------------------------------------------------------------------------------------------------------------------------------------------------------------------------------------------------------------------------------------------------|--------------|
| Nickel<br>(2006)[10],<br>Nickel<br>(2007)[11] | Design: Double-<br>blinded RCT<br><br>Setting:<br>University<br>hospitals<br><br>Country:<br>Austria,<br>Germany<br><br>Funding: None                         | N=52<br>G1 (26): Placebo<br>G2 (26):<br>Aripiprazole (15<br>mg/d)<br>8 weeks  | Inclusion: Males and females;<br>16 years of age or older; BPD<br>assessed with DSM-IV<br><br>Exclusion: Schizophrenia,<br>current use of other<br>psychotropic medication, past<br>termination of aripiprazole,<br>current psychotherapy,<br>pregnancy, suicidal ideation,<br>severe somatic illness, or<br>alcohol or drug abuse | Mean (SD) age: G1: 21<br>(4.6)<br><br>G2: 22 (3.4)<br><br>% Female: 83<br><br>% Race/ethnicity: NR | Primary outcome: SCL-90-R, HAM-D,<br>HAM-A, STAXI at 8 weeks<br><br>Significantly greater improvements for G2<br>than G1 on SCL-90-R (15.0 vs. 4.9;<br>p<0.001), HAM-D (6.4 vs. 2.1; p=0.002),<br>HAM-A (7.0 vs. 3.3; p=0.007), STAXI (13.6<br>vs. 5.7; p<0.001)<br><br>18 months follow-up for SCL-90-R: 17.9<br>vs. 1.4; p<0.01<br><br>Incidence of AEs: NR<br><br>Withdrawals due to AEs: NR<br><br>Attrition: 25%<br><br>Differential attrition:<br>≤10 percentage points | Moderate     |
| Nickel<br>(2005)[12]                          | Design: Double-<br>blinded RCT<br><br>Setting:<br>Outpatient<br>recruitment and<br>community<br>advertisement<br><br>Country:<br>Germany<br><br>Funding: None | N=44<br>G1 (22): Placebo<br>G2 (22):<br>Topiramate (250<br>mg/day)<br>8 weeks | Inclusion: Males; at least 18<br>years of age; DSM IV criteria<br>for BPD<br><br>Exclusion: Acute psychosis;<br>severe major depression, or<br>bipolar disorder; current use of<br>psychotropic medication, or<br>psychotherapy; somatically ill,<br>actively suicidal, substance use<br>disorder                                  | Mean (SD) age:<br>G1: 29 (NR)<br>G2: 30 (NR)<br><br>% Female: 0<br><br>% Race/ethnicity: NR        | Primary outcome: STAXI at 8 weeks<br><br>G2 significantly more effective than G1<br>on 4 out of 5 subscales on STAXI (p-values<br>from 0.05 to 0.01); no significant<br>improvement on subscale assessing<br>tendency to repress anger. Overall STAXI<br>score: NR<br><br>Incidence of AEs: NR<br><br>Withdrawal due to AEs:<br>G1: 0% (0/22)<br>G2: 0% (0/22)<br><br>Attrition: 5%<br><br>Differential attrition: <10 percentage<br>points                                   | Moderate     |

(continued)

Supplementary Material Table 4: Study Characteristics and Findings of Included Trials (continued)

| Author (year)<br>Trial name | Study characteristics                                                                                                                     | N of participants<br>Interventions<br>Duration                                               | Study population including<br>main inclusion and exclusion<br>criteria                                                                                                                                                                                                                                                                                                                    | Sample demographics                                                                    | Primary outcome; main results;<br>attrition                                                                                                                                                                                                                                                                                                                                                                             | Risk of bias |
|-----------------------------|-------------------------------------------------------------------------------------------------------------------------------------------|----------------------------------------------------------------------------------------------|-------------------------------------------------------------------------------------------------------------------------------------------------------------------------------------------------------------------------------------------------------------------------------------------------------------------------------------------------------------------------------------------|----------------------------------------------------------------------------------------|-------------------------------------------------------------------------------------------------------------------------------------------------------------------------------------------------------------------------------------------------------------------------------------------------------------------------------------------------------------------------------------------------------------------------|--------------|
| Nickel<br>(2004)[13]        | Design: Double-<br>blinded RCT<br>Setting:<br>Community<br>recruitment<br>Country:<br>Germany<br>Funding: None                            | N=31<br>G1 (10): Placebo<br>(50 mg/day)<br>G2 (21):<br>Topiramate (250<br>mg/day)<br>8 weeks | Inclusion: Females, 20 to 35<br>years of age; DSM-IV criteria<br>for BPD<br>Exclusion: Current<br>schizophrenia, major<br>depression, or bipolar<br>disorder; current use of<br>psychotropic medication, or<br>psychotherapy; somatically ill,<br>actively suicidal; substance<br>abuse                                                                                                   | Mean (SD) age:<br>G1: 27 (NR)<br>G2: 26 (NR)<br>% Female: 100<br>% Race/ethnicity: NR  | Primary outcome: STAXI at 8 weeks<br>G2 significantly more effective than G1<br>on 4 out of 5 subscales on STAXI (p-values<br>from 0.05 to 0.01); no significant<br>improvement on subscale assessing<br>tendency to repress anger. Overall STAXI<br>score: NR<br>Incidence of AEs: NR<br>Withdrawal due to AEs:<br>G1: 0% (0/10)<br>G2: 0% (0/21)<br>Attrition: 6%<br>Differential attrition: <10 percentage<br>points | Moderate     |
| Pascual<br>(2008)[14]       | Design: Double-<br>blinded RCT<br>Setting:<br>Outpatient,<br>single center<br>Country: Spain<br>Funding: Pfizer,<br>government<br>funding | N=60<br>G1 (30): Placebo<br>G2 (30):<br>Ziprasidone (40<br>to 200 mg/d)<br>12 weeks          | Inclusion: Males and females;<br>18 to 45 years of age; DSM-IV<br>criteria for BPD; current use of<br>medically accepted<br>contraception for females<br>Exclusion: Schizophrenia, drug<br>induced psychosis, organic<br>brain syndrome, alcohol or<br>other substance use disorder,<br>bipolar disorder, intellectual<br>disability, or major depressive<br>episode in course; CGI-S ≥ 4 | Mean (SD) age: G1: 29<br>(6.3)<br>G2: 29 (6.0)<br>% Female: 82<br>% Race/ethnicity: NR | Primary outcome: CGI-BPD at 12 weeks<br>No significant differences on CGI-BPD,<br>SCL-90, HAM-A, HAM-D, and clinical<br>psychotic symptoms.<br>Incidence of AEs:<br>G1: 13% (4/30)<br>G2: 37% (11/30)<br>Withdrawal due to AEs:<br>G1: 0% (0/30)<br>G2: 30% (9/30)<br>Attrition: 52%<br>Differential attrition:<br>≤10 percentage points                                                                                | High         |

(continued)

Supplementary Material Table 4: Study Characteristics and Findings of Included Trials (continued)

| Author (year)<br>Trial name | Study characteristics                                                                                                                  | N of participants<br>Interventions<br>Duration                                        | Study population including<br>main inclusion and exclusion<br>criteria                                                                                                                                                                                                                                                                                                                                                                   | Sample demographics                                                                              | Primary outcome; main results;<br>attrition                                                                                                                                                                                                                                                                                                                                                                                                                                                                                                                                      | Risk of bias |
|-----------------------------|----------------------------------------------------------------------------------------------------------------------------------------|---------------------------------------------------------------------------------------|------------------------------------------------------------------------------------------------------------------------------------------------------------------------------------------------------------------------------------------------------------------------------------------------------------------------------------------------------------------------------------------------------------------------------------------|--------------------------------------------------------------------------------------------------|----------------------------------------------------------------------------------------------------------------------------------------------------------------------------------------------------------------------------------------------------------------------------------------------------------------------------------------------------------------------------------------------------------------------------------------------------------------------------------------------------------------------------------------------------------------------------------|--------------|
| Reich<br>(2009)[15]         | Design: Double-<br>blinded RCT<br>Setting:<br>Outpatient,<br>single center<br>Country: United<br>States<br>Funding:<br>GlaxoSmithKline | N=28<br>G1 (13): Placebo<br>G2 (15):<br>Lamotrigine (50-<br>275 mg/day)<br>12 weeks   | Inclusion: DSM-IV criteria for<br>BPD; $\geq 8$ on DIB-R; "serious"<br>score on the affective<br>instability item of the Zanarini<br>Rating Scale for BPD; $\geq 14$ on<br>ALS<br>Exclusion: Dementia;<br>psychiatric disorder; bipolar<br>disorder; psychotic disorder;<br>substance use disorder;<br>currently hospitalized;<br>previous treatment with<br>lamotrigine or psychotherapy;<br>active suicidal or homicidal<br>ideation   | Mean (SD) age:<br>G1: 35 (9.7)<br>G2: 28 (9.5)<br>% Female: 89<br>% Race/ethnicity: White:<br>89 | Primary outcome: Affective Liability Scale;<br>Affective Instability Item of the ZAN-BPD at<br>12 weeks<br>Significantly greater improvements on G2<br>than G1 on Affective Liability Scale (vs. 0.71<br>vs. 0.40; $p=0.012$ ) subscale for affective<br>liability of the Zanarini Rating Scale for BPD<br>(1.5 vs. 1.1; $p=0.043$ )<br>No significant difference on ZAN-BPD<br>Incidence of AEs:<br>G1: 31% (4/13)<br>G2: 40% (6/15)<br>Withdrawal due to AEs:<br>G1: 0% (0/13)<br>G2: 0% (3/15)<br>Attrition: Overall: 39%<br>Differential attrition: <10 percentage<br>points | High         |
| Schulz<br>(2008)[16]        | Design: Double-<br>blinded RCT<br>Setting:<br>Outpatient,<br>multicenter<br>Country:<br>Multicountry<br>Funding: Eli Lilly             | N=314<br>G1 (159): Placebo<br>G2 (155):<br>Olanzapine (2.5<br>to 20 mg/d)<br>12 weeks | Inclusion: Males and females;<br>18 to 65 years of age; DSM-IV<br>criteria for BPD; ZAN-BPD total<br>score of 9<br>Exclusion: Schizophrenia,<br>bipolar I disorder, delusional<br>disorder, MDD, bipolar II<br>disorder, substance use<br>disorder, PTSD, panic disorder,<br>OCD; BMI < 17; use of<br>antidepressants, mood<br>stabilizer, antipsychotic<br>medication within 1 week of<br>randomization; new<br>psychotherapy treatment | Mean (SD) age: G1: 32<br>(9.6)<br>G2: 32 (9.5)<br>% Female: 71<br>% Race/ethnicity:<br>White: 87 | Primary outcome: ZAN BPD at 12 weeks<br>No significant differences on ZAN-BPD,<br>SCL-90-R, and MADRS,<br>Sheehan Disability Scale, GAF, MOAS: data<br>NR<br>Incidence of AEs:<br>G1: 57% (90/159)<br>G2: 66% (102/155)<br>Withdrawal due to AEs:<br>G1: 11% (18/159)<br>G2: 11% (17/155)<br>Attrition: 43%<br>Differential attrition:<br>$\leq 10$ percentage points                                                                                                                                                                                                            | High         |

(continued)

Supplementary Material Table 4: Study Characteristics and Findings of Included Trials (continued)

| Author (year)<br>Trial name | Study characteristics                                                                                                         | N of participants<br>Interventions<br>Duration                                                | Study population including<br>main inclusion and exclusion<br>criteria                                                                                                                                                                                                      | Sample demographics                                                                                            | Primary outcome; main results;<br>attrition                                                                                                                                                                                                                                                                                                                                                                      | Risk of bias |
|-----------------------------|-------------------------------------------------------------------------------------------------------------------------------|-----------------------------------------------------------------------------------------------|-----------------------------------------------------------------------------------------------------------------------------------------------------------------------------------------------------------------------------------------------------------------------------|----------------------------------------------------------------------------------------------------------------|------------------------------------------------------------------------------------------------------------------------------------------------------------------------------------------------------------------------------------------------------------------------------------------------------------------------------------------------------------------------------------------------------------------|--------------|
| Simpson<br>(2004)[17]       | Design: Double-<br>blinded RCT<br>Setting:<br>Outpatient,<br>single center<br>Country: United<br>States<br>Funding: Eli Lilly | N=25<br>G1 (13): Placebo<br>G2 (12):<br>Fluoxetine (40<br>mg/day)<br>12 weeks                 | Inclusion: Admissions to the<br>Women's Partial Program;<br>DSM-IV criteria for BPD<br>Exclusion: Substance use<br>disorder; seizure disorder;<br>unstable medical conditions;<br>history of schizophrenia or<br>bipolar disorder; previous<br>adequate trial of fluoxetine | Mean (SD) age: 35 (10.1)<br>% Female: 100<br>% Race/ethnicity:<br>White: 72<br>Black: 20<br>Native American: 8 | Primary outcome: NR<br>When corrected for multiple testing, no<br>significant differences between G1 and<br>G2 on STAXI, MOAS, or GAF at mean of<br>10 weeks<br>Incidence of AEs: NR<br>Withdrawal due to AEs: NR<br>Attrition: 20%<br>Differential attrition: ≤10 percentage<br>points                                                                                                                          | High         |
| Soler<br>(2005)[18]         | Design: Double-<br>blinded RCT<br>Setting:<br>Outpatient,<br>single center<br>Country: Spain<br>Funding: Eli Lilly            | N=60<br>G1 (30):<br>DBT+placebo<br>G2 (30):<br>DBT+olanzapine<br>(5 to 20 mg/day)<br>12 weeks | Inclusion: Females; 18 to 45<br>years of age; DSM-IV criteria<br>for BPD; without comorbid,<br>unstable axis I disorder; CGI<br>severity of illness score ≥4; not<br>receiving psychotherapy<br>Exclusion: NR                                                               | Mean (SD) age: G1: 26<br>(5.4)<br>G2: 28 (6.3)<br>% Female: 87<br>% Race/ethnicity:<br>NR                      | Primary outcome: NR<br>Significantly greater improvements for G2<br>than G1 on HRSD (8.79 vs. 4.87; p=0.004)<br>and the frequency of aggressive behavior<br>(data NR; p=0.03)<br>No significant differences on HAM-A, CGI-<br>S, and episodes of suicide attempts and<br>self-injury<br>Incidence of AEs: NR<br>Withdrawals due to AEs: NR<br>Attrition: 30%<br>Differential attrition:<br>≤10 percentage points | High         |

(continued)

Supplementary Material Table 4: Study Characteristics and Findings of Included Trials (continued)

| Author (year)<br>Trial name | Study characteristics                                                                                                | N of participants<br>Interventions<br>Duration                                                                   | Study population including<br>main inclusion and exclusion<br>criteria                                                                                                                                                                                                                                                                                                                                                                                                                                                                       | Sample demographics                                                                                                                                                                                                             | Primary outcome; main results;<br>attrition                                                                                                                                                                                                                                                                                                                                                                                                                                                                                                                             | Risk of bias |
|-----------------------------|----------------------------------------------------------------------------------------------------------------------|------------------------------------------------------------------------------------------------------------------|----------------------------------------------------------------------------------------------------------------------------------------------------------------------------------------------------------------------------------------------------------------------------------------------------------------------------------------------------------------------------------------------------------------------------------------------------------------------------------------------------------------------------------------------|---------------------------------------------------------------------------------------------------------------------------------------------------------------------------------------------------------------------------------|-------------------------------------------------------------------------------------------------------------------------------------------------------------------------------------------------------------------------------------------------------------------------------------------------------------------------------------------------------------------------------------------------------------------------------------------------------------------------------------------------------------------------------------------------------------------------|--------------|
| Tritt<br>(2005)[19]         | Design: Double-blinded RCT<br>Setting: single center or multicenter<br>Country: Germany and Austria<br>Funding: None | N=27<br>G1 (9): Placebo<br>G2 (18): Lamotrigine (200 mg/day)<br>8 weeks                                          | Inclusion: Female; 20 to 40 years of age; DSM-IV criteria for BPD<br>Exclusion: Schizophrenia; major depression or bipolar disorder; current use of psychotropic medication, or psychotherapy; somatically ill; actively suicidal; substance abuse                                                                                                                                                                                                                                                                                           | Mean (SD) age:<br>G1: 29 (NR)<br>G2: 29 (NR)<br>% Female: 100<br>% Race/ethnicity: NR                                                                                                                                           | Primary outcome: STAXI at 8 weeks<br>G2 significantly more effective than G1 on all 5 subscales of STAXI (p-values from <0.05 to <0.01; overall STAXI score: NR<br>Assessments after 8 weeks of treatment indicated that G2 improved more than G1 with respect to all STAXI scales<br>Incidence of AEs: NR<br>Withdrawal due to AEs:<br>G1: 11% (1/9)<br>G2: 6% (1/18)<br>Attrition: 11%<br>Differential attrition: ≤10 percentage points                                                                                                                               | Low          |
| Zanarini<br>(2011)[20]      | Design: Double-blinded RCT<br>Setting: Outpatient, multicenter<br>Country: Multicountry<br>Funding: Eli Lilly        | N=451<br>G1 (153): Placebo<br>G2 (150): Olanzapine (2.5 mg/d)<br>G3 (148): Olanzapine (5 to 10 mg/d)<br>12 weeks | Inclusion: Males and females; 18 to 65 years of age; DSM-IV criteria for BPD, ZAN-BPD total score ≥ 9<br>Exclusion: Schizophrenia, schizoaffective disorder, schizophreniform disorder, bipolar I disorder, delusional disorder, MDD, bipolar II disorder, substance use disorder within the previous 3 months; PTSD, panic disorder, OCD; actively suicidal; BMI < 17; cluster A personality disorder; new psychotherapy within the 3 months prior to visit 1; use of anticholinergic medication as prophylaxis for extrapyramidal symptoms | Mean (SD) age: G1: 34 (11.3)<br>G2: 33 (11.2)<br>G3: 33 (10.0)<br>% Female: 74<br>% Race/ethnicity:<br>White: 65<br>African descent: 7<br>East/Southeast Asian: 2<br>Western Asian: 0.2<br>Hispanic: 24.6<br>Other origin: 11.1 | Primary outcome: ZAN-BPD at 12 weeks<br>G3 significantly more effective than G1 on ZAN-BPD (-8.5 vs. -6.8; p=0.01; response: 74% vs. 60%; p=0.018) and SCL-90-R (-0.7 vs. -0.6; p<0.05)<br>No significant differences between G1 and G3 on MADRS, GAF, MOAS<br>No significant differences between G1 and G2 on most outcome measures<br>Incidence of AEs:<br>G1: 61% (93/153)<br>G2: 65% (98/150)<br>G3: 67% (99/148)<br>Withdrawal due to AE:<br>G1: 3% (5/153)<br>G2: 3% (5/150)<br>G3: 6% (9/148)<br>Attrition: 35%<br>Differential attrition: ≤10 percentage points | Moderate     |

(continued)

Supplementary Material Table 4: Study Characteristics and Findings of Included Trials (continued)

| Author (year)<br>Trial name | Study characteristics                                                                                                                     | N of participants<br>Interventions<br>Duration                                                                                                                                                                | Study population including<br>main inclusion and exclusion<br>criteria                                                                                                                                                                                                                                                                                                                                      | Sample demographics                                                                    | Primary outcome; main results;<br>attrition                                                                                                                                                                                                                                                                                                                                                                                                                                                                                                      | Risk of bias |
|-----------------------------|-------------------------------------------------------------------------------------------------------------------------------------------|---------------------------------------------------------------------------------------------------------------------------------------------------------------------------------------------------------------|-------------------------------------------------------------------------------------------------------------------------------------------------------------------------------------------------------------------------------------------------------------------------------------------------------------------------------------------------------------------------------------------------------------|----------------------------------------------------------------------------------------|--------------------------------------------------------------------------------------------------------------------------------------------------------------------------------------------------------------------------------------------------------------------------------------------------------------------------------------------------------------------------------------------------------------------------------------------------------------------------------------------------------------------------------------------------|--------------|
| Zanarini<br>(2004)[21]      | Design: double-<br>blinded RCT<br><br>Setting:<br>Outpatient,<br>single center<br><br>Country: United<br>States<br><br>Funding: Eli Lilly | N=45<br><br>G1 (14):<br>Fluoxetine (10-30<br>mg/day)<br><br>G2 (16):<br>Olanzapine (2.5-<br>7.5 mg/day)<br><br>G3 (15):<br>Fluoxetine (10-30<br>mg/day) and<br>olanzapine (2.5-<br>7.5 mg/day)<br><br>8 weeks | Inclusions: Female; 18 to 40<br>years of age; DSM-IV criteria<br>for BPD; does not meet criteria<br>for current major depressive<br>disorder<br><br>Exclusion: Current major<br>depressive disorder, lifetime<br>schizophrenia, schizoaffective<br>disorder, or bipolar disorder;<br>current use of psychotropic<br>medications; medical illness;<br>seizure disorder; substance<br>abuse; acutely suicidal | Mean (SD) age: 23 (5.7)<br><br>% Female: 100<br><br>% Race/ethnicity:<br><br>White: 80 | Primary outcome: NR<br><br>G2 and G3 significantly more effective<br>than G1 on MOAS (19.7 vs. 20.2 vs. 15.4;<br>p=0.003 for G2 vs. G1; p<0.001 for G3 vs.<br>G1) at 8 weeks<br><br>G2 and G3 significantly more effective<br>than G1 on MADRS (13.6 vs. 11.9 vs. 8.2;<br>p<0.001 for G2 vs. G1; p=0.02 for G3 vs.<br>G1) at 8 weeks<br><br>Incidence of AEs: NR<br><br>Withdrawal due to AEs:<br>G1: 7% (1/14)<br>G2: 0% (0/16)<br>G3: 7% (1/15)<br><br>Attrition:<br><br>Total: 7%<br><br>Differential attrition:<br><br>≤10 percentage points | Moderate     |

(continued)



Supplementary Material Table 4: Study Characteristics and Findings of Included Trials (continued)

| Author (year)<br>Trial name | Study characteristics                                                                                                                      | N of participants<br>Interventions<br>Duration                              | Study population including<br>main inclusion and exclusion<br>criteria                                                                                                                                                                   | Sample demographics                                                                                               | Primary outcome; main results;<br>attrition                                                                                                                                                                                                                                                                                                                                                                             | Risk of bias |
|-----------------------------|--------------------------------------------------------------------------------------------------------------------------------------------|-----------------------------------------------------------------------------|------------------------------------------------------------------------------------------------------------------------------------------------------------------------------------------------------------------------------------------|-------------------------------------------------------------------------------------------------------------------|-------------------------------------------------------------------------------------------------------------------------------------------------------------------------------------------------------------------------------------------------------------------------------------------------------------------------------------------------------------------------------------------------------------------------|--------------|
| Zanarini<br>(2001)[22]      | Design: Double-<br>blinded RCT<br><br>Setting:<br>Outpatients,<br>single center<br><br>Country: United<br>States<br><br>Funding: Eli Lilly | N=28<br>G1 (9): Placebo<br>G2 (19):<br>Olanzapine (2.5<br>mg/d)<br>6 months | Inclusion: Females; 18 to 40<br>years of age; DSM-IV criteria<br>for BPD<br><br>Exclusion: Major depression;<br>previous treatment with<br>olanzapine; currently on<br>psychotropic medications;<br>actively abusing alcohol or<br>drugs | Mean (SD) age:<br>G1: 26 (4.5)<br>G2: 28 (7.7)<br>% Female: 100<br>% Race/ethnicity:<br>White: 71<br>Nonwhite: 29 | Primary outcome: SCL-90 at 6 months<br><br>Significantly greater improvements of G2<br>than G1 on 4 domains of the SCL-90<br>(interpersonal sensitivity, anxiety,<br>anger/hostility, paranoia)<br><br>Overall score of SCL-90: NR<br><br>Incidence of AEs: NR<br><br>Withdrawal due to AEs:<br>G1: 0% (0/9)<br>G2: 16% (3/19)<br><br>Attrition: 68%<br><br>Differential attrition:<br>G1: 89% (8/9)<br>G2: 58% (11/19) | High         |

**Abbreviations:** AE, adverse event; ALS, Affective Liability Scale BMI, body mass index; BPD, borderline personality disorder; BPDSI, Borderline Personality Disorder Severity Index; CGI, Clinical Global Impression Scale, CGI-BPD, Clinical Global Impression Scale for Borderline Personality Disorder; CGI-S, Clinical Global Impression–Severity Scale; DBT, dialectical behavior therapy; DIB-R, Revised Diagnostic Interview for Borderlines; DSM-IV, *Diagnostic and Statistical Manual of Mental Disorders*; EQ-5D, European Quality of Life–5; ER, extended release; G1, Group 1; G2, Group 2; G3, Group 3; GAF, Global Assessment of Functioning; HAM-A, Hamilton Anxiety Rating Scale; HAM-D, Hamilton Depression Rating Scale; HRSD, Hamilton Rating Scale for Depression; LABILE, Lamotrigine and Borderline Personality Disorder: Investigating Long-Term Effects; MADRS, Montgomery-Åsberg Depression Rating Scale; MDD, major depressive disorder; MOAS, Modified Overt Aggression Scale; N, sample size; NIHR, National Institute for Health Research; NIMH, National Institute of Mental Health; NR, not reported; OCD, obsessive compulsive disorder; PTSD, post-traumatic stress disorder; RCT, randomized controlled trial; SCID-II, DSM-IV Axis II Disorders; SCL-90, Symptom Checklist-90; SCL-90-R, Symptom Checklist-90-Revised; SD, standard deviation; SF-36, Short Form Survey; STAXI, State-Trait Anger Expression Inventory; ZAN-BPD, Zanarini Rating Scale for Borderline Personality Disorder.

Supplementary Material Table 5: Certainty of Evidence Ratings

**Table 5.1 Certainty-of-evidence ratings for second-generation antipsychotics versus placebo**

| Outcomes                                                                                                      | No. of participants (studies)          | Certainty of the evidence (GRADE)                                 | Relative effect (95% CI)           | Anticipated absolute effects                       |                                                            |
|---------------------------------------------------------------------------------------------------------------|----------------------------------------|-------------------------------------------------------------------|------------------------------------|----------------------------------------------------|------------------------------------------------------------|
|                                                                                                               |                                        |                                                                   |                                    | Effect with placebo                                | Difference in effect with second-generation antipsychotics |
| <b>Severity of BPD</b><br>assessed with Zanarini Rating Scale for BPD<br>follow-up: range 8 weeks to 12 weeks | 860<br>(3 RCTs)[1, 16, 20]             | ⊕⊕○○<br>LOW <sup>a</sup> for no effect of SGA                     | -                                  | The mean score at endpoint was <b>10.3 points*</b> | mean <b>1.2 points lower</b>                               |
| <b>Anger</b><br>assessed with: STAXI<br>follow-up: mean 8 weeks                                               | 52<br>(1 RCT)[10]                      | ⊕⊕○○<br>LOW <sup>b</sup> for effect of SGA                        | -                                  | The mean score at endpoint was <b>26.2 points</b>  | mean <b>7.7 points lower</b> (p<0.001)                     |
| <b>Aggression</b><br>assessed with: Modified Overt Aggression Scale<br>follow-up: range 8 weeks to 12 weeks   | 515<br>(3 RCTs) [2, 7] [20]            | ⊕⊕○○<br>LOW <sup>a,c</sup> for no effect of olanzapine            | -                                  | The mean score at endpoint was <b>18.6 points*</b> | mean <b>14.7 points lower</b> (ns)                         |
| <b>Aggression</b><br>assessed with: Modified Overt Aggression Scale<br>follow-up: range 8 weeks to 12 weeks   | 95<br>(1 RCT)[1].                      | ⊕⊕○○<br>LOW <sup>b</sup> for effect of quetiapine ER              | -                                  | The mean score at endpoint was NR                  | NR                                                         |
| <b>Depression</b><br>assessed with: HAM-D and MADRS<br>follow-up: range 8 weeks to 21 weeks                   | 497<br>(5 RCTs)[7, 10, 14, 18, 20]     | ⊕⊕○○<br>LOW <sup>d,e</sup> for no effect of SGA                   | -                                  | The mean score at endpoint was NR                  | mean <b>0.28 SDs (Cohen's d) greater</b> (-0.05 to 0.60)   |
| <b>Impulsiveness</b><br>assessed with: Barratt Impulsiveness Scale<br>follow-up: range 8 weeks to 12 weeks    | 155<br>(2 RCTs) [1, 14]                | ⊕⊕○○<br>LOW <sup>d,f</sup> for no effect of SGA                   | -                                  | The mean score at endpoint was <b>69.1 points*</b> | mean <b>1.4 points lower</b> (ns)                          |
| <b>General Psychopathology</b><br>assessed with: SCL-90<br>follow-up: range 8 weeks to 12 weeks               | 698<br>(5 RCTs)[1, 2, 10, 14, 20]      | ⊕⊕⊕○<br>MODERATE <sup>a</sup> for effect of SGA                   | -                                  | The mean score at endpoint was <b>10.3 points*</b> | mean <b>1.2 points lower</b> (ns)                          |
| <b>Functioning</b><br>assessed with: GAF and Sheehan Disability Scale<br>follow-up: mean 8 weeks to 12 weeks  | 586<br>(3 RCTs)[1, 2, 20]              | ⊕⊕⊕○<br>MODERATE <sup>g</sup> for no effect of SGA                | -                                  | The mean score at endpoint was <b>63.2*</b>        | mean <b>2.9 higher</b> (ns)                                |
| <b>Incidence of Adverse Events</b>                                                                            | 920<br>(4 RCTs)[1, 14, 16, 20]         | ⊕⊕⊕○<br>MODERATE <sup>a</sup> for higher risk with antipsychotics | <b>RR 1.10</b><br>(1.00 to 1.21)   | 571 per 1,000                                      | <b>57 more per 1,000</b><br>(0 fewer to 120 more)          |
| <b>Withdrawal due to Adverse Events</b>                                                                       | 917 (5 RCTs)[2, 7, 14, 16, 20, 22, 23] | ⊕⊕○○<br>LOW <sup>a,h</sup> for similar risks                      | <b>RR 1.91</b><br>(0.83 to 4.43)   | 69 per 1,000                                       | <b>63 more per 1,000</b><br>(12 fewer to 237 more)         |
| <b>Incidence of Serious Adverse Events</b>                                                                    | 957<br>(6 RCTs)[1, 2, 10, 14, 16, 20]  | ⊕○○○<br>VERY LOW <sup>i</sup> for higher risk with placebo        | <b>RR 0.46</b><br>(0.23 to 0.95)** | 44 per 1,000                                       | <b>24 fewer per 1,000</b><br>(34 fewer to 2 fewer)         |

\*Effect estimate from largest study or the study with the lowest risk of bias (Zanarini et al., 2011<sup>43</sup> or Black et al., 2014<sup>25</sup>).

\*\*Effect estimate from Zanarini et.al., 2011;<sup>43</sup> The other studies reported that no serious adverse events occurred.

**The risk in the intervention group** (and its 95% CI) is based on the assumed risk in the comparison group and the **relative effect** of the intervention (and its 95% CI).

<sup>a</sup> The majority of studies were high risk of bias; downgraded 2 steps for study limitations.

<sup>b</sup> Small study, does not meet optimal information size; downgraded 2 steps for imprecision.

<sup>c</sup> Schulz et al. assessed MOAS but did not report data; downgraded 1 step for reporting bias.

<sup>d</sup> At least half of studies were high risk of bias; downgraded 1 step for study limitations.

<sup>e</sup> Inconsistent effects, largest study shows substantially smaller treatment effect; downgraded 1 step for inconsistency.

<sup>f</sup> Small study, does not meet optimal information size; downgraded 1 step for imprecision.

<sup>g</sup> Does not meet optimal information size; downgraded 1 step for imprecision.

<sup>h</sup> Few events; downgraded 1 step for imprecision.

<sup>i</sup> Very few events; downgraded 2 steps for imprecision.

**Abbreviations:** BPD, borderline personality disorder; CI, confidence interval; GAF, Global Assessment of Functioning; GRADE Grading of Recommendations Assessment, Development, and Evaluation; HAM-D, Hamilton Depression Rating Scale; MADRS, Montgomery-Åsberg Depression Rating Scale; NR, not reported; ns, not significant; RCT, randomized controlled trial; RR, risk ratio; SCL-90, Symptom Checklist-90, SD, standard deviation; SGA, second-generation antipsychotics; STAXI: State-Trait Anger Expression Inventory.

**Table 5.2 Certainty-of-evidence ratings of studies comparing anticonvulsants with placebo**

| Outcomes                                                                                                               | No. of participants (studies) | Certainty of the evidence (GRADE)                                  | Relative effect (95% CI)         | Anticipated absolute effects                                  |                                                           |
|------------------------------------------------------------------------------------------------------------------------|-------------------------------|--------------------------------------------------------------------|----------------------------------|---------------------------------------------------------------|-----------------------------------------------------------|
|                                                                                                                        |                               |                                                                    |                                  | Effect with placebo                                           | Difference in effect with anticonvulsants                 |
| <b>Divalproex sodium</b>                                                                                               |                               |                                                                    |                                  |                                                               |                                                           |
| <b>Severity of BPD</b><br>assessed with: Borderline Evaluation of Severity Over Time<br>follow-up: mean 12 weeks       | 15<br>(1 RCT)[9]              | ⊕○○○<br>VERY LOW <sup>a,b</sup> for no effect of divalproex sodium | -                                | The mean score at endpoint was <b>30.0</b> points             | mean <b>1.3 points lower</b> (ns)                         |
| <b>Aggression</b><br>assessed with: MOAS; SCL-90-R subscale for anger and hostility<br>follow-up: range 10 weeks to 24 | 46<br>(2 RCTs)[5, 6]          | ⊕○○○<br>VERY LOW <sup>a,c,d</sup> for effect of divalproex sodium  | -                                | The mean score on MOAS was <b>3.2</b> points*                 | mean <b>0.6 points lower</b> (p=0.03)                     |
| <b>Impulsiveness</b><br>assessed with: Barratt Impulsiveness Scale-Motor<br>follow-up: mean 12 weeks                   | 15<br>(1 RCT)[9]              | ⊕○○○<br>VERY LOW <sup>a,b</sup> for no effect of divalproex sodium | -                                | The mean score at endpoint was <b>18.2</b> points             | mean <b>5.7 points higher</b> (ns)                        |
| <b>General Psychopathology</b><br>assessed with: SCL-90-R, CGI-I<br>follow-up: range 10 weeks to 12 weeks              | 31<br>(2 RCTs)[6, 9]          | ⊕○○○<br>VERY LOW <sup>a,d</sup> for no effect of divalproex sodium | -                                | The mean score at endpoint on SCL-90 was <b>114.2</b> points* | mean <b>22.8 points higher</b> (ns)                       |
| <b>Withdrawals due to adverse events</b><br>follow-up: range 10 to 24 weeks                                            | 46<br>(2 RCTs)[5, 6]          |                                                                    | <b>RR 0.26</b><br>(0.03 to 2.35) | 136 per 1,000*                                                | <b>101 fewer per 1,000</b><br>(132 fewer to 184 more; ns) |
| <b>Lamotrigine</b>                                                                                                     |                               |                                                                    |                                  |                                                               |                                                           |
| <b>Severity of BPD</b><br>assessed with: ZAN-BPD<br>follow-up: range 12 weeks to 52 weeks                              | 304<br>(2 RCTs)[4, 15]        | ⊕⊕⊕○<br>MODERATE <sup>e</sup> for no effect of lamotrigine         | -                                | The mean score at endpoint was <b>11.5</b> points*            | mean <b>0.5 points lower</b> (ns)                         |
| <b>Affective lability</b><br>assessed with: Affective Lability Scale<br>follow-up: mean 12 weeks                       | 28<br>(1 RCT)[15]             | ⊕○○○<br>VERY LOW <sup>b,f</sup> for effect of lamotrigine          | -                                | The mean at endpoint score was <b>1.52</b> points             | mean <b>0.27 points lower</b> (p=0.012)                   |
| <b>Alcohol and substance use</b> assessed with ASSIST<br>follow-up: mean 52 weeks                                      | 160<br>(1 RCT)[4]             | ⊕⊕○○<br>LOW <sup>g</sup> for no effect of lamotrigine              | -                                | The mean score at endpoint was <b>23</b> points               | mean <b>4 points higher</b> (ns)                          |
| <b>Anger</b><br>assessed with: STAXI<br>follow-up: mean 8 weeks                                                        | 27<br>(1 RCT)[19]             | ⊕⊕○○<br>LOW <sup>g</sup> for effect of lamotrigine                 | -                                | The mean score at endpoint was <b>NR</b>                      | <b>NR</b><br>(4 of 5 subscales significantly improved)    |
| <b>Functioning</b><br>assessed with: Social Functioning Questionnaire<br>follow-up: mean 52 weeks                      | 276<br>(1 RCT)[4]             | ⊕⊕⊕○<br>MODERATE <sup>e,g</sup> for no effect of lamotrigine       | -                                | The mean score at endpoint was <b>12.3</b> points             | mean <b>0.1 points higher</b> (ns)                        |

|                                                                                                 |                          |                                                   |                                   |                                                   |                                                         |
|-------------------------------------------------------------------------------------------------|--------------------------|---------------------------------------------------|-----------------------------------|---------------------------------------------------|---------------------------------------------------------|
| <b>Incidence of Adverse Events</b><br>follow-up: range 10 weeks to 52 weeks                     | 304<br>(2 RCTs)[4, 15]   | ⊕⊕○○<br>LOW <sup>e</sup> for similar risks        | <b>RR 0.86</b><br>(0.71 to 1.03)  | 630 per 1,000*                                    | <b>88 fewer per 1,000</b><br>(183 fewer to 19 more; ns) |
| <b>Incidence of Serious Adverse Events</b><br>follow-up: mean 52 weeks                          | 276<br>(1 RCT)[4]        | ⊕⊕○○<br>LOW <sup>h</sup> for similar risks        | <b>RR 0.82</b><br>(0.52 to 1.31)  | 230 per 1,000                                     | <b>41 fewer per 1,000</b><br>(111 fewer to 71 more; ns) |
| <b>Withdrawal due to Adverse Events</b><br>follow-up: range 10 weeks to 52 weeks                | 328 (3 RCTs) [4, 15, 19] | ⊕○○○<br>VERY LOW <sup>h,i</sup> for similar risks | <b>RR 3.79</b><br>(0.82 to 17.57) | 12 per 1,000                                      | <b>35 more per 1,000</b><br>(2 fewer to 206 more; ns)   |
| <b>Topiramate</b>                                                                               |                          |                                                   |                                   |                                                   |                                                         |
| <b>Anger</b><br>assessed with: STAXI<br>follow-up: mean 8 weeks                                 | 75<br>(2 RCTs)[12, 13]   | ⊕⊕○○<br>LOW <sup>e</sup> for effect of topiramate | -                                 | The mean score at endpoint was NR                 | NR<br>(4 of 5 subscales significantly improved)         |
| <b>General Psychopathology</b><br>assessed with: SCL-90<br>follow-up: range 8 weeks to 12 weeks | 56<br>(1 RCT)[8]         | ⊕⊕○○<br>LOW <sup>e</sup> for effect of topiramate | -                                 | The mean score at endpoint was <b>70.1</b> points | mean <b>5.9</b> points lower<br>(p<0.001)               |
| <b>Withdrawal due to Adverse Events</b>                                                         | 75<br>(2 RCTs)[12, 13]   | ⊕○○○<br>VERY LOW <sup>e,i</sup> for similar risks | <b>RR 1.95</b><br>(0.77 to 4.94)  | 0 per 1,000                                       | 0 fewer per 1,000<br>(0 fewer to 0 fewer)               |

\*Effect estimate from largest study or the study with the lowest risk of bias.

The risk in the intervention group (and its 95% CI) is based on the assumed risk in the comparison group and the relative effect of the intervention (and its 95% CI).

<sup>a</sup> High attrition; downgraded 1 step for risk of bias.

<sup>b</sup> Small study, does not meet optimal information size; downgraded 2 steps for imprecision.

<sup>c</sup> Conflicting results of two studies; downgraded 1 step for inconsistency.

<sup>d</sup> Small studies, do not meet optimal information size; downgraded 2 steps for imprecision.

<sup>e</sup> Sample size probably does not meet optimal information size; downgraded 1 step for imprecision.

<sup>f</sup> Trial with high risk of bias, downgraded 1 step for risk of bias.

<sup>g</sup> Few events; downgraded 2 steps for imprecision.

<sup>h</sup> Very few events; downgraded 2 steps for imprecision.

<sup>i</sup> Proportions vary substantially; downgraded 1 step for inconsistency.

<sup>j</sup> One study does not report data on withdrawal due to adverse events; downgraded 1 step for outcomes reporting bias.

**Abbreviations:** ASSIST, Alcohol, Smoking, and Substance Involvement Screening Test; BPD, borderline personality disorder; CGI-I, Clinical Global Impressions–Improvement Scale; CI, confidence interval; GRADE Grading of Recommendations Assessment, Development, and Evaluation; MOAS, Modified Overt Aggression Scale Checklist; NR, not reported; ns, not significant; RCT, randomized controlled trial; RR, risk ratio; SCL-90, Symptom Checklist-90; SCL-90-R, Symptom Checklist-90-Revised; STAXI, State-Trait Anger Expression Inventory; ZAN-BPD, Zanarini Rating Scale for Borderline Personality Disorder.

**Table 5.3** Certainty-of-evidence ratings of studies comparing antidepressants with placebo

| Outcomes                                                             | No. of participants (studies) | Certainty of the evidence (GRADE)                                 | Relative effect (95% CI) | Anticipated absolute effects                         |                                                        |
|----------------------------------------------------------------------|-------------------------------|-------------------------------------------------------------------|--------------------------|------------------------------------------------------|--------------------------------------------------------|
|                                                                      |                               |                                                                   |                          | Effect with placebo                                  | Difference in effect second-generation antidepressants |
| <b>Anger</b><br>assessed with: STAXI<br>follow-up: mean 10 weeks     | 25<br>(1 RCT)[17]             | ⊕○○○<br>VERY LOW <sup>a,b</sup> for<br>no effect of<br>fluoxetine | -                        | The mean score at<br>endpoint was <b>27.6</b> points | mean <b>7.1 lower</b><br>(ns)                          |
| <b>Aggression</b><br>assessed with: MOAS<br>follow-up: mean 10 weeks | 25<br>(1 RCT)[17]             | ⊕○○○<br>VERY LOW <sup>a,b</sup> for<br>no effect of<br>fluoxetine | -                        | The mean score at<br>endpoint was NR                 | NR (ns)                                                |
| <b>Functioning</b><br>assessed with: GAF<br>follow-up: mean 10 weeks | 25<br>(1 RCT)[17]             | ⊕○○○<br>VERY LOW <sup>a,b</sup> for<br>no effect of<br>fluoxetine | -                        | The mean score at<br>endpoint was <b>59.3</b> points | mean <b>0.6 higher</b><br>(ns)                         |

The risk in the intervention group (and its 95% CI) is based on the assumed risk in the comparison group and the relative effect of the intervention (and its 95% CI).

<sup>a</sup> No intention-to-treat analysis; downgraded 1 step for risk of bias.

<sup>b</sup> Small study, does not meet optimal information size; downgraded 2 steps for imprecision.

**Abbreviations:** CI, confidence interval; GAF, Global Assessment of Functioning; GRADE Grading of Recommendations Assessment, Development, and Evaluation; MOAS, Modified Overt Aggression Scale; NR, not reported; ns, not significant; RCT, randomized controlled trial; STAXI, State-Trait Anger Expression Inventory.

**Table 5.4 Certainty-of-evidence ratings of studies comparing second-generation antipsychotic with second-generation antidepressants**

| Outcomes                                                             | No. of participants (studies) | Certainty of the evidence (GRADE)                                    | Relative effect (95% CI)          | Anticipated absolute effects                      |                                                            |
|----------------------------------------------------------------------|-------------------------------|----------------------------------------------------------------------|-----------------------------------|---------------------------------------------------|------------------------------------------------------------|
|                                                                      |                               |                                                                      |                                   | Effect with antidepressants                       | Difference in effect with second-generation antipsychotics |
| <b>Olanzapine vs. Fluoxetine</b>                                     |                               |                                                                      |                                   |                                                   |                                                            |
| <b>Aggression</b><br>assessed with: MOAS<br>follow-up: mean 8 weeks  | 30<br>(1 RCT)[21]             | ⊕○○○<br>LOW <sup>b</sup> for greater effect of olanzapine            | -                                 | The mean score at endpoint was <b>7.83</b> points | mean <b>4.3 points lower</b> (p=0.003)                     |
| <b>Depression</b><br>assessed with: MADRS<br>follow-up: mean 8 weeks | 30<br>(1 RCT)[21]             | ⊕○○○<br>LOW <sup>b</sup> for greater effect of olanzapine            | -                                 | The mean score at endpoint was <b>6.2</b> points  | mean <b>1.0 points lower</b> (p<0.001)                     |
| <b>Olanzapine+Fluoxetine vs. Fluoxetine</b>                          |                               |                                                                      |                                   |                                                   |                                                            |
| <b>Aggression</b><br>assessed with: MOAS<br>follow-up: mean 8 weeks  | 29<br>(1 RCT)[21]             | ⊕○○○<br>LOW <sup>b</sup> for greater effect of olanzapine+fluoxetine | -                                 | The mean score at endpoint was <b>7.83</b> points | mean <b>4.8 points lower</b> (p<0.001)                     |
| <b>Depression</b><br>assessed with: MADRS<br>follow-up: mean 8 weeks | 29<br>(1 RCT)[21]             | ⊕○○○<br>LOW <sup>b</sup> for greater effect of olanzapine+fluoxetine | -                                 | The mean score at endpoint was <b>6.2</b> points  | mean <b>1.8 points lower</b> (p=0.02)                      |
| <b>Withdrawals due to Adverse Events</b><br>follow-up: mean 8 weeks  | 29<br>(1 RCT)[21]             | ⊕○○○<br>VERY LOW <sup>a,b</sup> for similar risks                    | <b>RR 0.94</b><br>(0.06 to 13.68) | 71 per 1,000                                      | <b>4 fewer per 1,000</b><br>(67 fewer to 906 more)         |

The risk in the intervention group (and its 95% CI) is based on the assumed risk in the comparison group and the relative effect of the intervention (and its 95% CI).

<sup>a</sup> Unclear how withdrawal due to adverse events was determined; downgraded 1 step for indirectness.

<sup>b</sup> Small study, does not meet optimal information size; downgraded 2 steps for imprecision.

**Abbreviations:** CI, confidence interval; GRADE Grading of Recommendations Assessment, Development, and Evaluation; MADRS, Montgomery-Åsberg Depression Scale; MOAS, Modified Overt Aggression Scale; RCT, randomized controlled trial; RR, risk ratio.

**Table 5.5 Certainty-of-evidence ratings of studies comparing second-generation antipsychotics with second-generation antipsychotics**

| Outcomes                                                                                       | No. of participants (studies) | Certainty of the evidence (GRADE)                                | Relative effect (95% CI)         | Anticipated absolute effects                |                                                      |
|------------------------------------------------------------------------------------------------|-------------------------------|------------------------------------------------------------------|----------------------------------|---------------------------------------------|------------------------------------------------------|
|                                                                                                |                               |                                                                  |                                  | Effect with olanzapine                      | Difference in effect with asenapine                  |
| <b>Severity of BPD</b><br>assessed with: BPD Severity Index<br>follow-up: mean 12 weeks        | 51<br>(1 RCT)[3]              | ⊕○○○<br>VERY LOW <sup>a,b</sup> for similar effects <sup>-</sup> |                                  | The mean score at endpoint was <b>49.12</b> | mean <b>2.23 lower</b> (ns)                          |
| <b>Aggression</b><br>assessed with: MOAS<br>follow-up: mean 12 weeks                           | 51<br>(1 RCT)[3]              | ⊕○○○<br>VERY LOW <sup>a,b</sup> for similar effects <sup>-</sup> |                                  | The mean score at endpoint was <b>4.8</b>   | mean <b>1.4 higher</b> (ns)                          |
| <b>Impulsiveness</b><br>assessed with: Barratt Impulsiveness Scale<br>follow-up: mean 12 weeks | 51<br>(1 RCT)[3]              | ⊕○○○<br>VERY LOW <sup>a,b</sup> for similar effects <sup>-</sup> |                                  | The mean score at endpoint was <b>72.9</b>  | mean <b>8.2 lower</b> (ns)                           |
| <b>Self-harm</b><br>assessed with: Self-Harm Inventory<br>follow-up: mean 12 weeks             | 51<br>(1 RCT)[3]              | ⊕○○○<br>VERY LOW <sup>a,b</sup> for similar effects <sup>-</sup> |                                  | The mean score at endpoint was <b>10</b>    | mean <b>2 lower</b> (ns)                             |
| <b>Global Impression</b><br>assessed with: CGI-S<br>follow-up: mean 12 weeks                   | 51<br>(1 RCT)[3]              | ⊕○○○<br>VERY LOW <sup>a,b</sup> for similar effects <sup>-</sup> |                                  | The mean score at endpoint was <b>3.9</b>   | mean <b>0.2 lower</b> (ns)                           |
| <b>Incidence of Adverse Events</b><br>follow-up: mean 12 weeks                                 | 40<br>(1 RCT)[3]              | ⊕○○○<br>VERY LOW <sup>a,b</sup> for similar risks                | <b>RR 1.38</b><br>(0.43 to 4.40) | 263 per 1,000                               | <b>100 more per 1,000</b><br>(150 fewer to 895 more) |

The risk in the intervention group (and its 95% CI) is based on the assumed risk in the comparison group and the relative effect of the intervention (and its 95% CI).

<sup>a</sup> High attrition; downgraded 1 step for risk of bias.

<sup>b</sup> Small study, does not meet optimal information size; downgraded 2 steps for imprecision.

**Abbreviations:** BPD, borderline personality disorder; CGI-S, Clinical Global Impression-Improvement Scale; CI, confidence interval; GRADE Grading of Recommendations Assessment, Development, and Evaluation; MOAS, Modified Overt Aggression Scale Checklist; ns, not significant; RCT, randomized controlled trial; RR, risk ratio.



Supplementary Material Table 6. Summary of Clinical Assessment Scales for Borderline Personality Disorder

| Measure | Full name                                          | Description                                                                                                                                                                                                                                                                                                                                                                                                                                                               | Minimally important difference |
|---------|----------------------------------------------------|---------------------------------------------------------------------------------------------------------------------------------------------------------------------------------------------------------------------------------------------------------------------------------------------------------------------------------------------------------------------------------------------------------------------------------------------------------------------------|--------------------------------|
| ALS     | Affective Lability Scale                           | Items: 54 item self-report measure of lability of anger<br>Scale: 0 to 3 (greater affective lability)<br>Scoring: Patients rate different features of mood instability on a 4-point Likert scale from 0 (very uncharacteristic) to 3 (very characteristic); the total score is the mean of all item responses divided by the number of responses                                                                                                                          | NR                             |
| BIS-11  | Barratt Impulsiveness Scale                        | Items: 30-item self-report questionnaire designed to measure impulsivity, items describe common impulsive or nonimpulsive behaviors and preferences<br>Scale: 30 to 120 (greater impulsivity)<br>Scoring: Each item is rated on a 4-point Likert scale from 1 (rarely/never) to 4 (almost always/always); overall score is calculated from the sum of the 30 items                                                                                                        | NR                             |
| BEST    | Borderline Evaluation of Severity Over Time        | Items: 15-item self-report questionnaire designed to assess change in the severity of BPD during the prior month<br>Scale: 12 (best) to 72 (worst)<br>Scoring: Each item is rated on a 5-point Likert scale from 1 (none/never) to 5 (extreme/almost always); items are divided among 3 subscales (A, B, C); total score is calculated by adding together the scores of subscales A and B then subtracting the total from subscale C and adding a correction factor of 15 | NR                             |
| BPDSI   | Borderline Personality Disorder Severity Index     | Items: 70-item semi-structured clinical interview measure assessing frequency and severity of BPD-related symptoms among nine symptom areas corresponding to DSM-IV criteria<br>Scale: 0 to 90 (scores above 15 signify BPD pathology)<br>Scoring: Each item is rated on an 11-point scale from 0 (never) to 10 (daily); for each DSM criterion an average score is derived (range=0-10) with the sum of these 9 scores providing the total score                         | NR                             |
| CGI-I   | Clinical Global Impression scale, Improvement item | Items: 1-item clinician-rated instrument to conduct global assessment of illness improvement<br>Scale: 1 to 7<br>Scoring: A clinician rates patient's mental illness on a scale from 1 (very much improved) to 7 (very much worse)                                                                                                                                                                                                                                        | NR                             |
| CGI-S   | Clinical Global Impression Scale, Severity item    | Items: 1 item clinician-rated instrument to conduct global assessment of illness severity<br>Scale: 0 to 7<br>Scoring: A clinician rates patient's mental illness on a 7-point scale: 1 (normal, not at all ill), 2 (borderline mentally ill), 3 (mildly ill), 4 (moderately ill), 5 (markedly ill), 6 (severely ill), 7 (among the most extremely ill patients); the score should reflect the average severity level across the past 7 days                              | NR                             |

(continued)

Supplementary Material Table 6. Summary of Clinical Assessment Scales for Borderline Personality Disorder (continued)

| Measure | Full name                                 | Description                                                                                                                                                                                                                                                                                                                                                                                                                                                                                                                                                    | Minimally important difference |
|---------|-------------------------------------------|----------------------------------------------------------------------------------------------------------------------------------------------------------------------------------------------------------------------------------------------------------------------------------------------------------------------------------------------------------------------------------------------------------------------------------------------------------------------------------------------------------------------------------------------------------------|--------------------------------|
| EQ-5D   | European Quality of Life-5 Dimension      | Items: 5-item instrument to measure health-related quality of life in Europe<br>Scale: 0 (worst) to 100 (best)<br>Scoring: Each item can be rated at one of 3 response levels: "slight problems," "moderate problems," "extreme problems"                                                                                                                                                                                                                                                                                                                      | NR                             |
| GAF     | Global Assessment of Functioning          | Items: 100-item clinician-rated instrument indicating overall psychosocial functioning during a specified period on a continuum from psychological sickness to health<br>Scale: 0 to 100 (severely impaired to extremely high functioning)<br>Scoring: GAF rating can be based on many things, including: an interview or questionnaire, medical records, information from medical providers, caregivers, or relatives, police or court records about violent or illegal behavior; the summary score reflects the level of an individual's overall functioning | NR                             |
| HAM-A   | Hamilton Anxiety Rating Scale             | Items: 14-item questionnaire used to assess patients' anxiety<br>Scale: 0 to 56 (<17=mild severity, 18-24=mild to moderate severity, >25=severe)<br>Scoring: Each item is rated on a 5-point Likert scale from 0 (not present) to 4 (most severe); the sum of the score indicates the severity of anxiety                                                                                                                                                                                                                                                      | NR                             |
| HAM-D   | Hamilton Depression Rating Scale          | Items: 17 or more item questionnaire used to assess patients' depression<br>Scale: 0 to 53 (0-7 considered normal and >20 considered moderate severity)<br>Scoring: Each item is rated on a 3- or 5-point Likert scale from 0 to 2 or 0 to 4; the sum of the score indicates the severity of depression                                                                                                                                                                                                                                                        | NR                             |
| MOAS    | Modified Overt Aggression Scale           | Items: 20-item clinician-administered, semi-structured interview designed to assess various manifestations of aggressive behavior in outpatients<br>Scale: 0 to 100 (no symptoms to severe)<br>Scoring: 4 subcomponent types of aggression are scored between 0 (no aggression) and 4 with a potential cumulative score of 10 for each subcomponent with each subcomponent is weighted differently; total score is calculated by multiplying sum score of each subcomponent by the weight for that category, then summing the weighted scores                  | NR                             |
| MADRS   | Montgomery-Åsberg Depression Rating Scale | Items: 10-item clinician-rated measure of severity of ten depressive symptoms<br>Scale: 0 to 60 (0-6 is defined as symptom absent and >34 is defined as severe depression)                                                                                                                                                                                                                                                                                                                                                                                     | NR                             |

| Measure | Full name | Description                                                                                                                                              | Minimally important difference |
|---------|-----------|----------------------------------------------------------------------------------------------------------------------------------------------------------|--------------------------------|
|         |           | Scoring: Each item is rated on a scale from 0 to 6, with 6 as the most severe description of the symptom; total score is the sum of scores for each item |                                |

(continued)

Supplementary Material Table 6. Summary of Clinical Assessment Scales for Borderline Personality Disorder (continued)

| Measure  | Full name                                                 | Description                                                                                                                                                                                                                                                                                                                                                                                                                                                                                                                                                                                            | Minimally important difference |
|----------|-----------------------------------------------------------|--------------------------------------------------------------------------------------------------------------------------------------------------------------------------------------------------------------------------------------------------------------------------------------------------------------------------------------------------------------------------------------------------------------------------------------------------------------------------------------------------------------------------------------------------------------------------------------------------------|--------------------------------|
| MOAS     | Overt Aggression Scale—Modified                           | Items: 20-item clinician-administered, semi-structured interview designed to assess various manifestations of aggressive behavior in outpatients<br><br>Scoring: Manifestations of aggression from the preceding week are scored between 0 (no events within that category) and 5 (most severe form of aggression within that category), frequency of events is then multiplied by a weighted severity level for that category (0 to 5) to produce a raw score for each subscale; each subscale is also weighted (1 to 3x) and total score is calculated by summing weighted scores from each subscale | NR                             |
| STAXI    | State-Trait Anger Expression Inventory                    | Items: 69-item self-report questionnaire that focuses on anger expression<br><br>Scoring: Each item is rated on a 4-point scale for frequency of exhibiting behavior (almost always, often, sometimes, almost never)                                                                                                                                                                                                                                                                                                                                                                                   | NR                             |
| SCL-90-R | Symptom Checklist-90-Revised                              | Items: 90-item self-report screening measure of general psychiatric symptomatology along nine symptom constructs<br><br>Scale: 0 to 4<br><br>Scoring: Each item is scored on a 5-point Likert scale from 0 (not at all bothered) to 4 (extremely bothered); Global Severity Index (GSI) can be calculated as the average score of the 90 items in the questionnaire                                                                                                                                                                                                                                    | NR                             |
| ZAN-BPD  | Zanarini Rating Scale for Borderline Personality Disorder | Items: 9-item semi structured interview<br><br>Scale: 0 to 36 (no symptoms to severe)<br><br>Scoring: Each item is rated on a 5-point Likert scale from 0 (no symptoms) to 4 (severe symptoms) on each of nine items corresponding to the nine DSM-IV criteria for BPD, total score is the sum of all items                                                                                                                                                                                                                                                                                            | NR                             |

**Abbreviations:** BPD, BPD, borderline personality disorder; DSM-IV, *Diagnostic and Statistical Manual of Mental Disorders*; GAF, Global Assessment of Functioning; GSI, Global Severity Index; MCID, minimal clinically important difference; NR, not reported; SCL-90, Symptom Checklist-90; STAXI, State-Trait Anger Expression Inventory.

Supplementary Material Figure 1: Risk of Bias Ratings

| Study              | Risk of bias domains |    |    |    |    | Overall |
|--------------------|----------------------|----|----|----|----|---------|
|                    | D1                   | D2 | D3 | D4 | D5 |         |
| Black (2014)       | +                    | +  | X  | +  | -  | -       |
| Bogenschutz (2004) | -                    | -  | X  | +  | -  | X       |
| Bozzatello (2017)  | -                    | +  | -  | X  | -  | X       |
| Crawford (2018)    | +                    | -  | -  | +  | +  | -       |
| Frankenburg (2002) | -                    | +  | X  | +  | -  | X       |
| Hollander (2001)   | -                    | +  | X  | +  | -  | X       |
| Linehan (2008)     | X                    | +  | X  | +  | X  | X       |
| Loew (2006)        | +                    | +  | +  | +  | -  | +       |
| Moen (2012)        | -                    | +  | X  | +  | -  | X       |
| Nickel (2004)      | -                    | +  | +  | +  | -  | -       |
| Nickel (2005)      | -                    | -  | +  | +  | -  | -       |
| Nickel (2006)      | +                    | +  | -  | +  | -  | -       |
| Pascual (2008)     | -                    | +  | X  | +  | +  | X       |
| Reich (2009)       | -                    | X  | X  | +  | -  | X       |
| Schulz (2008)      | +                    | +  | X  | +  | +  | X       |
| Simpson (2004)     | -                    | X  | +  | +  | -  | X       |
| Soler (2005)       | -                    | +  | X  | +  | -  | X       |
| Tritt (2005)       | +                    | +  | +  | +  | -  | +       |
| Zanarini (2001)    | -                    | X  | X  | -  | -  | X       |
| Zanarini (2004)    | -                    | -  | +  | +  | -  | -       |
| Zanarini (2011)    | +                    | +  | X  | +  | -  | -       |

Domains:

- D1: Bias arising from the randomization process
- D2: Bias due to deviations from intended interventions
- D3: Bias due to missing outcome data
- D4: Bias in measurement of the outcome
- D5: Bias in selection of reported results

Judgement

- X High
- Some concerns
- + Low

Supplementary Material Figure 2: Random effects meta-analysis of withdrawal due to adverse events comparing second-generation antipsychotics with placebo

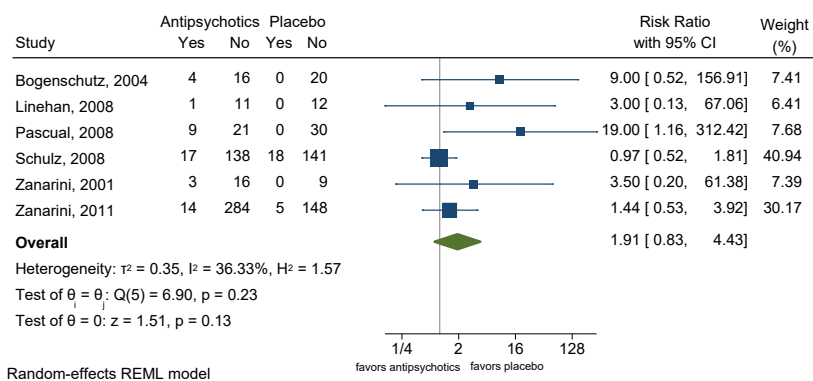

**Abbreviations:** CI, confidence interval; REML, restricted maximum likelihood.  
**References:** Bogenschutz, 2004[2]; Linehan, 2008[7]; Pascual, 2008[14]; Schulz, 2008[16]; Zanarini, 2001[22]; Zanarini, 2011[20]

Appendix Figure 3. Random effects meta-analysis of withdrawal due to adverse events comparing anticonvulsant medications with placebo

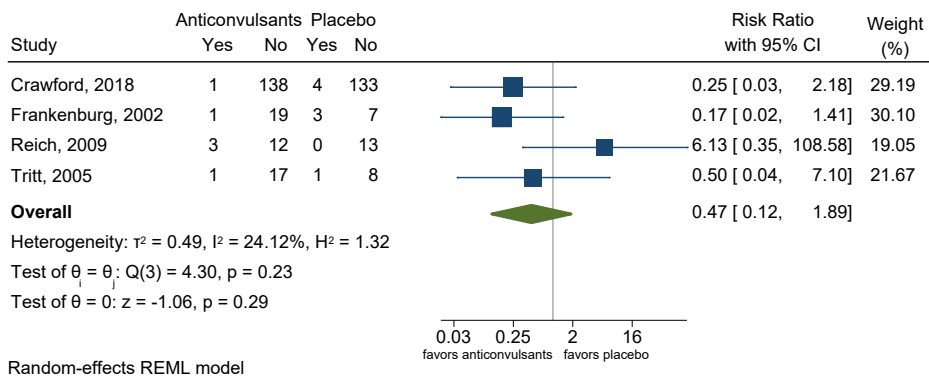

**Abbreviations:** CI, confidence interval; REML, restricted maximum likelihood.  
**References:** Crawford, 2018[4]; Frankenburg, 2002[5]; Reich, 2009[15]; Tritt, 2005[19]

## References

1. Black, D.W., et al., *Comparison of low and moderate dosages of extended-release quetiapine in borderline personality disorder: a randomized, double-blind, placebo-controlled trial*. Am J Psychiatry, 2014. **171**(11): p. 1174-82.
2. Bogenschutz, M.P. and H. George Nurnberg, *Olanzapine versus placebo in the treatment of borderline personality disorder*. J Clin Psychiatry, 2004. **65**(1): p. 104-9.
3. Bozzatello, P., et al., *Efficacy and Tolerability of Asenapine Compared with Olanzapine in Borderline Personality Disorder: An Open-Label Randomized Controlled Trial*. CNS Drugs, 2017. **31**(9): p. 809-819.
4. Crawford, M.J., et al., *The Clinical Effectiveness and Cost-Effectiveness of Lamotrigine in Borderline Personality Disorder: A Randomized Placebo-Controlled Trial*. Am J Psychiatry, 2018. **175**(8): p. 756-764.
5. Frankenburg, F.R. and M.C. Zanarini, *Divalproex sodium treatment of women with borderline personality disorder and bipolar II disorder: a double-blind placebo-controlled pilot study*. J Clin Psychiatry, 2002. **63**(5): p. 442-6.
6. Hollander, E., et al., *A preliminary double-blind, placebo-controlled trial of divalproex sodium in borderline personality disorder*. J Clin Psychiatry, 2001. **62**(3): p. 199-203.
7. Linehan, M.M., et al., *Olanzapine plus dialectical behavior therapy for women with high irritability who meet criteria for borderline personality disorder: a double-blind, placebo-controlled pilot study*. J Clin Psychiatry, 2008. **69**(6): p. 999-1005.
8. Loew, T.H., et al., *Topiramate treatment for women with borderline personality disorder: a double-blind, placebo-controlled study*. J Clin Psychopharmacol, 2006. **26**(1): p. 61-6.
9. Moen, R., et al., *Efficacy of extended-release divalproex combined with "condensed" dialectical behavior therapy for individuals with borderline personality disorder*. Ann Clin Psychiatry, 2012. **24**(4): p. 255-60.
10. Nickel, M.K., et al., *Aripiprazole in the treatment of patients with borderline personality disorder: a double-blind, placebo-controlled study*. Am J Psychiatry, 2006. **163**(5): p. 833-8.
11. Nickel, M.K., T.H. Loew, and F. Pedrosa Gil, *Aripiprazole in treatment of borderline patients, part II: an 18-month follow-up*. Psychopharmacology (Berl), 2007. **191**(4): p. 1023-6.
12. Nickel, M.K., et al., *Treatment of aggression with topiramate in male borderline patients: a double-blind, placebo-controlled study*. Biol Psychiatry, 2005. **57**(5): p. 495-9.
13. Nickel, M.K., et al., *Topiramate treatment of aggression in female borderline personality disorder patients: a double-blind, placebo-controlled study*. J Clin Psychiatry, 2004. **65**(11): p. 1515-9.
14. Pascual, J.C., et al., *Ziprasidone in the treatment of borderline personality disorder: a double-blind, placebo-controlled, randomized study*. J Clin Psychiatry, 2008. **69**(4): p. 603-8.
15. Reich, D.B., M.C. Zanarini, and K.A. Bieri, *A preliminary study of lamotrigine in the treatment of affective instability in borderline personality disorder*. Int Clin Psychopharmacol, 2009. **24**(5): p. 270-5.
16. Schulz, S.C., et al., *Olanzapine for the treatment of borderline personality disorder: variable dose 12-week randomised double-blind placebo-controlled study*. Br J Psychiatry, 2008. **193**(6): p. 485-92.
17. Simpson, E.B., et al., *Combined dialectical behavior therapy and fluoxetine in the treatment of borderline personality disorder*. J Clin Psychiatry, 2004. **65**(3): p. 379-85.
18. Soler, J., et al., *Double-blind, placebo-controlled study of dialectical behavior therapy plus olanzapine for borderline personality disorder*. Am J Psychiatry, 2005. **162**(6): p. 1221-4.
19. Tritt, K., et al., *Lamotrigine treatment of aggression in female borderline-patients: a randomized, double-blind, placebo-controlled study*. J Psychopharmacol, 2005. **19**(3): p. 287-91.

20. Zanarini, M.C., et al., *A dose comparison of olanzapine for the treatment of borderline personality disorder: a 12-week randomized, double-blind, placebo-controlled study*. J Clin Psychiatry, 2011. **72**(10): p. 1353-62.
21. Zanarini, M.C., F.R. Frankenburg, and E.A. Parachini, *A preliminary, randomized trial of fluoxetine, olanzapine, and the olanzapine-fluoxetine combination in women with borderline personality disorder*. J Clin Psychiatry, 2004. **65**(7): p. 903-7.
22. Zanarini, M.C. and F.R. Frankenburg, *Olanzapine treatment of female borderline personality disorder patients: a double-blind, placebo-controlled pilot study*. J Clin Psychiatry, 2001. **62**(11): p. 849-54.
23. Moher, D., et al., *Preferred reporting items for systematic review and meta-analysis protocols (PRISMA-P) 2015 statement*. Syst Rev, 2015. **4**(1): p. 1.
